# Supplementary material for: DNMT Inhibitors Increase Methylation in the Cancer Genome
Source: PubMed Central journal article supplement (PMC6491738; doi:10.3389/fphar.2019.00385), 2019-04-24
Supplement: Data_Sheet_1.pdf [file Data_Sheet_1.pdf]

Supplementary Table 1. List of 638 CpG showing increased methylation after decitabine treatment in HCTK116 cell line

| Chromosome | Base position | CpG           | Location in gene | Gene      |
|------------|---------------|---------------|------------------|-----------|
| 5          | 76332945      | ch.5.1443044F | Promoter         | AGGF1     |
| 10         | 79793495      | cg23620279    | Promoter         | RPS24     |
| 12         | 58087540      | cg18202167    | Promoter         | OS9       |
| 12         | 58087544      | cg00062356    | Promoter         | OS9       |
| 7          | 72299837      | cg19955956    | Promoter         | SBDSP     |
| 2          | 231729487     | cg15127563    | Promoter         | ITM2C     |
| 15         | 70390363      | cg07020846    | Promoter         | TLE3      |
| 6          | 33282175      | cg06097707    | Promoter         | TAPBP     |
| 8          | 17942583      | cg07312099    | Promoter         | ASAHI     |
| X          | 53310991      | cg14972383    | Promoter         | IQSEC2    |
| 7          | 150924351     | cg10436877    | Promoter         | ABCF2     |
| X          | 12993075      | cg23376554    | Promoter         | TMSB4X    |
| X          | 102510216     | cg14004049    | Promoter         | TCEAL8    |
| 1          | 43996436      | cg14172596    | Promoter         | PTPRF     |
| 1          | 113933413     | cg18539474    | Promoter         | MAGI3     |
| 7          | 107221074     | cg11785538    | Promoter         | BCAP29    |
| 13         | 49684397      | cg17091793    | Promoter         | FNDC3A    |
| 5          | 78281964      | cg26802063    | Promoter         | ARSB      |
| X          | 146312384     | cg27167381    | Promoter         | MIR506    |
| X          | 77154874      | cg10646076    | Promoter         | COX7B     |
| 4          | 7105115       | cg26600181    | Promoter         | FLJ36777  |
| 10         | 91152122      | cg16395953    | Promoter         | IFIT1     |
| X          | 101186742     | cg23922730    | Promoter         | ZMAT1     |
| 4          | 47033180      | cg21472546    | Promoter         | GABRB1    |
| 1          | 1981816       | cg22865720    | Promoter         | PRKCZ     |
| 11         | 55587104      | cg08060810    | Promoter         | OR5D18    |
| 10         | 63661280      | cg16253809    | Promoter         | ARID5B    |
| 1          | 23886472      | cg20485144    | Promoter         | ID3       |
| 19         | 58790298      | cg23548487    | Promoter         | ZNF8      |
| X          | 145082826     | cg15918587    | Promoter         | MIR891B   |
| 19         | 13885098      | cg09952620    | Promoter         | C19orf53  |
| 11         | 5905350       | cg06484232    | Promoter         | OR52E4    |
| 13         | 103426305     | cg13675958    | Promoter         | C13orf27  |
| 16         | 5008134       | cg08043782    | Promoter         | SEC14L5   |
| 5          | 158634905     | cg26362852    | Promoter         | RNF145    |
| 19         | 20368371      | cg22155405    | Promoter         | LOC284441 |
| 19         | 4066818       | cg10561472    | Promoter         | ZBTB7A    |
| 6          | 13615538      | cg05884522    | Promoter         | NOL7      |

|    |           |            |          |          |
|----|-----------|------------|----------|----------|
| 2  | 39005241  | cg15934678 | Promoter | GEMIN6   |
| 5  | 92918848  | cg05945291 | Promoter | NR2F1    |
| X  | 2984799   | cg17012513 | Promoter | ARSF     |
| 10 | 15210836  | cg23193446 | Promoter | NMT2     |
| 19 | 20011538  | cg27379065 | Promoter | ZNF93    |
| 13 | 28194831  | cg07375367 | Promoter | POLR1D   |
| 1  | 225616668 | cg20483690 | Promoter | LBR      |
| X  | 119737675 | cg05782751 | Promoter | MCTS1    |
| 19 | 54694174  | cg12173535 | Promoter | MBOAT7   |
| 19 | 37020332  | cg24909706 | Promoter | ZNF260   |
| 11 | 131779469 | cg08097520 | Promoter | NTM      |
| 15 | 72524656  | cg25016070 | Promoter | PKM2     |
| 4  | 25162716  | cg19113954 | Promoter | SEPSECS  |
| 5  | 92918072  | cg16448525 | Promoter | FLJ42709 |
| 6  | 160211006 | cg07151830 | Promoter | TCP1     |
| 5  | 135702333 | cg16219583 | Promoter | TRPC7    |
| 5  | 135701422 | cg17275074 | Promoter | TRPC7    |
| 8  | 24240597  | cg14143055 | Promoter | ADAMDEC1 |
| 1  | 3606550   | cg21388339 | Promoter | TP73     |
| X  | 153169465 | cg20664654 | Promoter | AVPR2    |
| 8  | 28748404  | cg06241765 | Promoter | INTS9    |
| X  | 102629870 | cg13486082 | Promoter | NGFRAP1  |
| 5  | 92917334  | cg08003613 | Promoter | FLJ42709 |
| 2  | 70476188  | cg24074685 | Promoter | TIA1     |
| X  | 102629912 | cg25198830 | Promoter | NGFRAP1  |
| X  | 12992684  | cg17625764 | Promoter | TMSL3    |
| 19 | 30432806  | cg27180365 | Promoter | C19orf2  |
| 12 | 50450889  | cg23126949 | Promoter | ACCN2    |
| 13 | 34391699  | cg08155354 | Promoter | RFC3     |
| 14 | 75535757  | cg15979150 | Promoter | FAM164C  |
| 3  | 69129729  | cg21635584 | Promoter | UBA3     |
| 1  | 25559743  | cg17651255 | Promoter | SYF2     |
| 9  | 113800909 | cg06148685 | Promoter | LPAR1    |
| 12 | 19282261  | cg13108328 | Promoter | PLEKHA5  |
| 18 | 48404491  | cg26727372 | Promoter | ME2      |
| X  | 128657727 | cg18959966 | Promoter | SMARCA1  |
| 1  | 10532838  | cg21149582 | Promoter | DFFA     |
| X  | 15354150  | cg18016370 | Promoter | PIGA     |
| 4  | 85888001  | cg14553853 | Promoter | WDFY3    |
| 11 | 108092818 | cg12019961 | Promoter | ATM      |
| 20 | 20032580  | cg06599170 | Promoter | C20orf26 |
| 4  | 68567439  | cg25695041 | Promoter | UBA6     |
| 3  | 52719268  | cg09817993 | Promoter | GNL3     |
| 6  | 30655567  | cg23903723 | Promoter | KIAA1949 |
| 9  | 139376822 | cg13820039 | Promoter | C9orf163 |

|    |           |            |          |           |
|----|-----------|------------|----------|-----------|
| 11 | 79114133  | cg25837979 | Promoter | MIR708    |
| 5  | 149379518 | cg26588194 | Promoter | HMGXB3    |
| 1  | 145469887 | cg12222699 | Promoter | ANKRD34A  |
| 6  | 3458177   | cg11713788 | Promoter | SLC22A23  |
| 19 | 12625436  | cg24109012 | Promoter | ZNF709    |
| 13 | 29597447  | cg07790085 | Promoter | MTUS2     |
| 11 | 5019849   | cg23434090 | Promoter | OR51L1    |
| 14 | 61191253  | cg09970023 | Promoter | SIX4      |
| 1  | 234040045 | cg10878114 | Promoter | SLC35F3   |
| 5  | 54319373  | cg14597388 | Promoter | GZMK      |
| 11 | 51413644  | cg23935054 | Promoter | OR4A5     |
| 16 | 420755    | cg09504571 | Promoter | MRPL28    |
| 19 | 20749738  | cg12124647 | Promoter | ZNF737    |
| 10 | 13628544  | cg15881990 | Promoter | PRPF18    |
| 10 | 15902872  | cg19707359 | Promoter | FAM188A   |
| 1  | 152087267 | cg22603037 | Promoter | TCHH      |
| 5  | 140592867 | cg14640659 | Promoter | PCDHB13   |
| 11 | 111807548 | cg11471799 | Promoter | DIXDC1    |
| 11 | 128458153 | cg16792062 | Promoter | ETS1      |
| 11 | 55577775  | cg05788138 | Promoter | OR5L1     |
| 14 | 78869352  | cg10828316 | Promoter | NRXN3     |
| 12 | 113773298 | cg12583184 | Promoter | SLC24A6   |
| X  | 77151316  | cg11290168 | Promoter | MAGT1     |
| 15 | 102344469 | cg26155802 | Promoter | OR4F6     |
| X  | 154254823 | cg09526164 | Promoter | FUNDC2    |
| 1  | 16010601  | cg09073052 | Promoter | PLEKHM2   |
| 11 | 55796572  | cg17060964 | Promoter | OR5AS1    |
| 15 | 54303927  | cg22845496 | Promoter | UNC13C    |
| 11 | 123814972 | cg15625631 | Promoter | OR6T1     |
| 4  | 184365198 | cg24787081 | Promoter | CDKN2AIP  |
| 1  | 159258877 | cg14696870 | Promoter | FCER1A    |
| 19 | 14683110  | cg16256643 | Promoter | NDUFB7    |
| 22 | 20004611  | cg12912949 | Promoter | ARVCF     |
| 1  | 151967449 | cg06698332 | Promoter | S100A10   |
| X  | 99892000  | cg11509733 | Promoter | TSPAN6    |
| 14 | 70715730  | cg20576094 | Promoter | ADAM21P1  |
| 1  | 241694605 | cg11150901 | Promoter | KMO       |
| 5  | 68513219  | cg15387943 | Promoter | MRPS36    |
| 5  | 159846543 | cg15333689 | Promoter | SLU7      |
| 14 | 55595666  | cg26335127 | Promoter | LGALS3    |
| X  | 77154732  | cg24112882 | Promoter | COX7B     |
| 4  | 155471778 | cg11404039 | Promoter | PLRG1     |
| 6  | 52149972  | cg18225895 | Promoter | MCM3      |
| 12 | 117319577 | cg14276619 | Promoter | HRK       |
| 10 | 44287023  | cg17952824 | Promoter | HNRNPA3P1 |

|    |           |                |          |             |
|----|-----------|----------------|----------|-------------|
| 12 | 67662516  | cg18750937     | Promoter | CAND1       |
| 1  | 248568331 | cg13053563     | Promoter | OR2T1       |
| 17 | 3627058   | cg14971744     | Body     | ITGAE       |
| 15 | 89010209  | cg20630605     | Body     | MRPL46      |
| 12 | 97885270  | cg27533635     | Body     | RMST        |
| X  | 131547702 | cg13633856     | Body     | MBNL3       |
| X  | 131547697 | cg14520512     | Body     | MBNL3       |
| 8  | 12974556  | cg06103928     | Body     | DLC1        |
| 4  | 76439140  | cg12093136     | Body     | RCHY1       |
| 5  | 54455564  | cg08212230     | Body     | CDC20B      |
| 21 | 39494547  | cg25816610     | Body     | DSCR8       |
| 1  | 231820076 | cg07134368     | Body     | TSNAX-DISC1 |
| 1  | 231964048 | cg22367981     | Body     | DISC1       |
| 1  | 44287964  | cg23290313     | Body     | ST3GAL3     |
| 3  | 171138553 | cg22901347     | Body     | TNIK        |
| 2  | 223151884 | cg11490745     | Body     | PAX3        |
| 16 | 74565916  | ch.16.1684049R | Body     | GLG1        |
| 12 | 45034784  | ch.12.897509F  | Body     | NELL2       |
| 19 | 52862167  | cg10341573     | Body     | ZNF610      |
| 1  | 114503218 | ch.1.2681285F  | Body     | HIPK1       |
| 10 | 79033545  | cg08772567     | Body     | KCNMA1      |
| 14 | 33826344  | cg15454195     | Body     | NPAS3       |
| 19 | 53619086  | cg22834281     | Body     | ZNF415      |
| X  | 21559778  | ch.X.346519R   | Body     | CNKSR2      |
| 20 | 45937282  | ch.20.1002962F | Body     | ZMYND8      |
| 7  | 69447465  | cg09703727     | Body     | AUTS2       |
| 5  | 155909246 | cg24132325     | Body     | SGCD        |
| 2  | 205591269 | cg18626478     | Body     | PARD3B      |
| X  | 70661061  | ch.X.1084407R  | Body     | TAF1        |
| 10 | 83848597  | cg17519477     | Body     | NRG3        |
| 3  | 189353419 | cg25708695     | Body     | TP63        |
| 22 | 21968010  | ch.22.149158R  | Body     | UBE2L3      |
| 14 | 80324276  | cg19753609     | Body     | NRXN3       |
| 7  | 69478390  | cg16819888     | Body     | AUTS2       |
| 7  | 154006066 | cg07467482     | Body     | DPP6        |
| 2  | 165998136 | cg16631432     | Body     | SCN3A       |
| 5  | 156097036 | cg15160274     | Body     | SGCD        |
| 2  | 50570407  | cg06707406     | Body     | NRXN1       |
| 20 | 34297200  | ch.20.707667F  | Body     | RBM39       |
| 7  | 147709862 | cg22807241     | Body     | MIR548F3    |
| 11 | 115369647 | cg11019127     | Body     | CADM1       |
| 3  | 25635650  | cg07405178     | Body     | RARB        |
| 10 | 108674143 | cg23024358     | Body     | SORCS1      |
| 4  | 85766242  | ch.4.1647744F  | Body     | WDFY3       |
| 2  | 100371023 | cg22092126     | Body     | AFF3        |

|    |           |                |      |              |
|----|-----------|----------------|------|--------------|
| 2  | 153575717 | cg07491444     | Body | ARL6IP6      |
| 13 | 34392781  | cg24492140     | Body | RFC3         |
| 2  | 159173778 | cg21514997     | Body | CCDC148      |
| 12 | 23998997  | cg06764736     | Body | SOX5         |
| 13 | 43545157  | cg17400905     | Body | EPSTI1       |
| 11 | 115096810 | cg25461513     | Body | CADM1        |
| 19 | 19923956  | ch.19.841535R  | Body | ZNF506       |
| 1  | 28886386  | ch.1.953398R   | Body | TRNAU1AP     |
| 2  | 116480197 | cg06394103     | Body | DPP10        |
| 5  | 59126518  | cg27583655     | Body | PDE4D        |
| 22 | 46114168  | ch.22.909671F  | Body | ATXN10       |
| 1  | 16715418  | ch.1.572291F   | Body | C1orf144     |
| 5  | 113805552 | cg25486361     | Body | KCNN2        |
| 13 | 60543691  | ch.13.865492R  | Body | DIAPH3       |
| 2  | 100175805 | cg17165836     | Body | AFF3         |
| 2  | 100365075 | cg13361307     | Body | AFF3         |
| 15 | 76136846  | cg16242106     | Body | UBE2Q2       |
| 12 | 50635579  | ch.12.1023240F | Body | LIMA1        |
| 2  | 227850069 | cg09157320     | Body | RHBDD1       |
| 20 | 10026325  | ch.20.221631R  | Body | ANKRD5       |
| 11 | 64795449  | cg21821990     | Body | SNX15        |
| 12 | 117611422 | ch.12.2406115F | Body | FBXO21       |
| 14 | 63508497  | cg25609301     | Body | KCNH5        |
| 8  | 38174205  | ch.8.903080R   | Body | WHSC1L1      |
| 2  | 192543258 | cg15794798     | Body | OBFC2A       |
| 7  | 150452495 | cg14319487     | Body | LOC100128542 |
| 15 | 61346347  | cg08099431     | Body | RORA         |
| 15 | 24411878  | cg15564871     | Body | PWRN2        |
| 10 | 132942686 | cg06938601     | Body | TCERG1L      |
| 13 | 26483520  | cg12565580     | Body | ATP8A2       |
| 3  | 194136354 | ch.3.3822654R  | Body | ATP13A3      |
| 5  | 11529629  | cg16051561     | Body | CTNND2       |
| 6  | 1836850   | cg21478123     | Body | GMDS         |
| 16 | 75044269  | ch.16.1700675R | Body | ZNRF1        |
| 10 | 132942731 | cg25486749     | Body | TCERG1L      |
| 5  | 166938213 | cg23167425     | Body | ODZ2         |
| 11 | 92264986  | cg07276831     | Body | FAT3         |
| 18 | 34194679  | ch.18.672159R  | Body | FHOD3        |
| 16 | 9010914   | ch.16.350833F  | Body | USP7         |
| 3  | 130299763 | cg17937340     | Body | COL6A6       |
| 6  | 1909853   | cg11276500     | Body | GMDS         |
| 10 | 15901893  | cg19053479     | Body | FAM188A      |
| 7  | 48319696  | cg10626169     | Body | ABCA13       |
| 1  | 45187551  | cg07722722     | Body | C1orf228     |
| 3  | 140229290 | cg23463099     | Body | CLSTN2       |

|    |           |                |      |              |
|----|-----------|----------------|------|--------------|
| 10 | 96306185  | cg10069677     | Body | HELLS        |
| 11 | 122037845 | cg15826891     | Body | LOC399959    |
| 5  | 168395173 | cg11458498     | Body | SLIT3        |
| 21 | 34978286  | cg12708807     | Body | CRYZL1       |
| 5  | 171653553 | ch.5.3268483F  | Body | UBTD2        |
| 15 | 80188894  | cg07293993     | Body | MTHFS        |
| 12 | 50527085  | ch.12.1019410F | Body | LASS5        |
| 1  | 10464086  | ch.1.385573R   | Body | PGD          |
| 3  | 21558209  | cg16439360     | Body | ZNF385D      |
| 1  | 241474238 | cg08238568     | Body | RGS7         |
| 5  | 138146102 | ch.5.2559743R  | Body | CTNNA1       |
| 5  | 41837108  | ch.5.884579R   | Body | OXCT1        |
| 10 | 114074843 | cg18014500     | Body | GUCY2G       |
| 1  | 181514216 | cg22359828     | Body | CACNA1E      |
| 17 | 1717862   | ch.17.79071R   | Body | SMYD4        |
| 5  | 7686199   | cg16253976     | Body | ADCY2        |
| 2  | 225441832 | cg11229715     | Body | CUL3         |
| 14 | 91751397  | ch.14.1452150F | Body | CCDC88C      |
| 8  | 35401908  | cg22872195     | Body | UNC5D        |
| 8  | 97855859  | cg08247527     | Body | PGCP         |
| 10 | 34817409  | cg19017553     | Body | PARD3        |
| 10 | 106749483 | cg26349484     | Body | SORCS3       |
| 3  | 35730993  | cg15459537     | Body | ARPP-21      |
| 9  | 14838752  | cg13762569     | Body | FREM1        |
| 15 | 41734226  | ch.15.433532F  | Body | RTF1         |
| 6  | 7297596   | ch.6.197209F   | Body | SSR1         |
| 13 | 94493055  | cg21222888     | Body | GPC6         |
| 8  | 119282796 | ch.8.2353618R  | Body | SAMD12       |
| 5  | 15780558  | ch.5.409282R   | Body | FBXL7        |
| 4  | 72635202  | cg24806812     | Body | GC           |
| 2  | 211401919 | ch.2.4215183F  | Body | CPS1         |
| 3  | 64801329  | cg21324884     | Body | MIR548A2     |
| 4  | 110553306 | ch.4.2065340F  | Body | CCDC109B     |
| 2  | 105686129 | ch.2.2207852R  | Body | MRPS9        |
| 1  | 212238115 | ch.1.4129519F  | Body | DTL          |
| 6  | 12910610  | cg14773588     | Body | PHACTR1      |
| 5  | 118874673 | ch.5.2173511R  | Body | HSD17B4      |
| 7  | 150451091 | cg06276978     | Body | LOC100128542 |
| 20 | 29847402  | cg25361651     | Body | DEFB115      |
| 3  | 54807076  | cg19093405     | Body | CACNA2D3     |
| 1  | 206768238 | ch.1.4018176R  | Body | LGTN         |
| 1  | 247691111 | cg25139877     | Body | LOC148824    |
| 4  | 44425078  | cg12709692     | Body | KCTD8        |
| 3  | 45553017  | cg15691035     | Body | LARS2        |
| 13 | 74491964  | ch.13.1085822R | Body | KLF12        |

|    |           |                |      |          |
|----|-----------|----------------|------|----------|
| 7  | 148111040 | ch.7.3089487R  | Body | CNTNAP2  |
| 3  | 121977827 | cg10364968     | Body | CASR     |
| 6  | 167200499 | cg18495191     | Body | RPS6KA2  |
| 17 | 49281558  | ch.17.1348593F | Body | MBTD1    |
| 1  | 21074008  | ch.1.705736F   | Body | HP1BP3   |
| 18 | 55024674  | cg21518865     | Body | ST8SIA3  |
| 5  | 33698653  | ch.5.731560F   | Body | ADAMTS12 |
| 10 | 69913749  | cg18986048     | Body | MYPN     |
| 2  | 1182847   | ch.2.35699F    | Body | SNTG2    |
| 8  | 144798631 | cg22892110     | Body | MAPK15   |
| 15 | 48515109  | cg23530596     | Body | SLC12A1  |
| 6  | 33393183  | cg11261678     | Body | SYNGAP1  |
| 1  | 36766063  | ch.1.1168472R  | Body | THRAP3   |
| 6  | 33395430  | cg19968421     | Body | SYNGAP1  |
| 5  | 136682394 | cg19567866     | Body | SPOCK1   |
| 6  | 136828807 | ch.6.2623783F  | Body | MAP7     |
| 9  | 18825658  | cg13724111     | Body | ADAMTSL1 |
| 3  | 124726246 | ch.3.2442921F  | Body | HEG1     |
| 4  | 154707153 | cg11467638     | Body | SFRP2    |
| 3  | 51637060  | ch.3.1119246R  | Body | RAD54L2  |
| 5  | 160053412 | cg27141889     | Body | ATP10B   |
| 8  | 14108012  | ch.8.362960F   | Body | SGCZ     |
| 3  | 73591147  | cg09236445     | Body | PDZRN3   |
| X  | 154255950 | cg10432310     | Body | FUNDC2   |
| 20 | 51648147  | cg09566894     | Body | TSHZ2    |
| 4  | 159918056 | cg22266824     | Body | C4orf45  |
| 2  | 44182106  | ch.2.1056241F  | Body | LRPPRC   |
| 9  | 111807413 | ch.9.1678974F  | Body | C9orf5   |
| 20 | 24953309  | ch.20.532344R  | Body | C20orf3  |
| 17 | 48194635  | cg11441693     | Body | SAMD14   |
| 14 | 79558823  | cg18818949     | Body | NRXN3    |
| 12 | 122065180 | cg24082347     | Body | ORAI1    |
| 5  | 98107521  | cg12949466     | Body | RGMB     |
| 1  | 241176676 | cg22231602     | Body | RGS7     |
| 19 | 12277357  | cg13689563     | Body | ZNF136   |
| 20 | 62645068  | ch.20.1534602F | Body | PRPF6    |
| 15 | 61500965  | cg20124735     | Body | RORA     |
| 15 | 59940044  | ch.15.825727F  | Body | GTF2A2   |
| 8  | 13092547  | ch.8.343778F   | Body | DLC1     |
| 5  | 126871056 | ch.5.2320326F  | Body | PRRC1    |
| 11 | 47659584  | ch.11.997072R  | Body | MTCH2    |
| 11 | 20621341  | cg20632573     | Body | SLC6A5   |
| 17 | 837017    | cg07494499     | Body | NXN      |
| 4  | 121668750 | ch.4.2245532F  | Body | PRDM5    |
| 19 | 10401361  | cg07097925     | Body | ICAM5    |

|    |           |                |       |          |
|----|-----------|----------------|-------|----------|
| 3  | 169994002 | ch.3.3303606F  | Body  | PRKCI    |
| 1  | 242310145 | cg07977614     | Body  | PLD5     |
| 5  | 167028535 | cg15651267     | Body  | ODZ2     |
| 3  | 15058168  | ch.3.343413R   | Body  | NR2C2    |
| 8  | 36763165  | cg12033248     | Body  | KCNU1    |
| 11 | 132931732 | cg18413062     | Body  | OPCML    |
| 7  | 32038956  | cg13298997     | Body  | PDE1C    |
| 9  | 88291443  | ch.9.1152820R  | Body  | AGTPBP1  |
| X  | 10087726  | cg25497053     | Body  | WWC3     |
| 12 | 126055778 | cg19992906     | Body  | TMEM132B |
| 7  | 98536084  | ch.7.2068158F  | Body  | TRRAP    |
| 4  | 128654094 | cg13665890     | Body  | SLC25A31 |
| 7  | 79765394  | cg25702790     | Body  | GNAI1    |
| 11 | 78071309  | ch.11.1702122F | Body  | GAB2     |
| 12 | 33589594  | cg06721860     | Body  | SYT10    |
| 11 | 63140804  | cg10116443     | Body  | SLC22A9  |
| 8  | 126142264 | cg12803053     | Body  | NSMCE2   |
| 3  | 159590447 | cg09811510     | Body  | SCHIP1   |
| 3  | 1382597   | cg16522250     | Body  | CNTN6    |
| 3  | 115618688 | cg16752940     | Body  | LSAMP    |
| 4  | 6676521   | cg16758887     | Body  | LOC93622 |
| 11 | 78400028  | cg07441953     | Body  | ODZ4     |
| 12 | 42877995  | cg20908919     | Other | PRICKLE1 |
| 4  | 130017238 | cg13107060     | Other | C4orf33  |
| 19 | 13262082  | cg15340644     | Other | IER2     |
| 5  | 59782121  | cg18611813     | Other | PDE4D    |
| 21 | 37433149  | cg17039262     | Other | SETD4    |
| 12 | 88536565  | cg20328917     | Other | TMTC3    |
| 12 | 121790694 | cg12210527     | Other | ANAPC5   |
| 6  | 36409495  | cg06422757     | Other | PXT1     |
| 1  | 34328907  | cg05723953     | Other | HMGB4    |
| X  | 31889692  | cg20522855     | Other | DMD      |
| 11 | 83393062  | cg13572369     | Other | DLG2     |
| 19 | 37061383  | cg10172250     | Other | ZNF529   |
| X  | 11282604  | cg08456555     | Other | ARHGAP6  |
| 6  | 153303350 | cg18198306     | Other | FBXO5    |
| 6  | 31515398  | cg00002930     | Other | NFKBIL1  |
| X  | 54834954  | cg09208571     | Other | MAGED2   |
| 20 | 47778018  | ch.20.1062061F | Other | STAU1    |
| 8  | 101963358 | cg11839355     | Other | YWHAZ    |
| 10 | 43902500  | cg12891252     | Other | HNRNPF   |
| 10 | 74855378  | cg19832312     | Other | P4HA1    |
| X  | 39954231  | cg07099245     | Other | BCOR     |
| 18 | 3263082   | cg19146448     | Other | MYL12B   |
| 19 | 47219957  | cg25522119     | Other | PRKD2    |



|    |           |                |       |           |
|----|-----------|----------------|-------|-----------|
| 9  | 74979581  | cg14026485     | Other | ZFAND5    |
| 2  | 208489667 | cg07496861     | Other | FAM119A   |
| 18 | 13375474  | cg26700919     | Other | C18orf1   |
| 3  | 132772692 | cg24837219     | Other | TMEM108   |
| 2  | 159905508 | ch.2.3260358R  | Other | TANC1     |
| 4  | 129731973 | cg11264547     | Other | PHF17     |
| 18 | 13375540  | cg21243597     | Other | C18orf1   |
| 3  | 114599007 | cg19149693     | Other | ZBTB20    |
| 15 | 91646263  | cg27121538     | Other | SV2B      |
| X  | 50028082  | cg11113650     | Other | CCNB3     |
| 1  | 205599988 | cg15558299     | Other | ELK4      |
| 18 | 13229005  | ch.18.316502R  | Other | C18orf1   |
| 11 | 57529465  | cg19210276     | Other | CTNND1    |
| 22 | 29137759  | cg22585269     | Other | CHEK2     |
| X  | 150867017 | cg15731296     | Other | PRRG3     |
| 19 | 38827331  | cg09094448     | Other | CATSPERG  |
| 6  | 152085641 | cg18132851     | Other | ESR1      |
| X  | 101186679 | cg26142661     | Other | ZMAT1     |
| 12 | 24577904  | cg24011341     | Other | SOX5      |
| 1  | 26565342  | ch.1.876374R   | Other | CCDC21    |
| 5  | 147101975 | cg11799006     | Other | JAKMIP2   |
| 10 | 21807252  | cg25195795     | Other | C10orf140 |
| 2  | 16839610  | cg09324018     | Other | FAM49A    |
| 3  | 125093863 | cg15705999     | Other | ZNF148    |
| 3  | 176914208 | cg07883762     | Other | TBL1XR1   |
| 16 | 62067937  | cg07244927     | Other | CDH8      |
| 6  | 166581272 | cg00070318     | Other | T         |
| 1  | 158149974 | cg24432768     | Other | CD1D      |
| 4  | 87857667  | cg19533294     | Other | AFF1      |
| 12 | 87106229  | cg14783993     | Other | MGAT4C    |
| 11 | 85359560  | cg26796873     | Other | TMEM126A  |
| 1  | 33722623  | cg11416597     | Other | ZNF362    |
| 18 | 21976748  | cg20528338     | Other | OSBPL1A   |
| 2  | 64880293  | cg11920737     | Other | SERTAD2   |
| X  | 48660813  | cg10783042     | Other | HDAC6     |
| 1  | 24118400  | cg11659749     | Other | LYPLA2    |
| 2  | 201677426 | cg14211387     | Other | BZW1      |
| 7  | 32526065  | cg26856631     | Other | LSM5      |
| 19 | 57324295  | cg08155759     | Other | PEG3      |
| 19 | 37001658  | cg25505109     | Other | ZNF260    |
| 15 | 100253379 | ch.15.1787851R | Other | MEF2A     |
| 5  | 2746667   | cg07766803     | Other | IRX2      |
| 19 | 21608124  | cg19023258     | Other | ZNF493    |
| 3  | 63602009  | cg11876912     | Other | SYNPR     |
| 19 | 12299253  | cg21880712     | Other | ZNF136    |

|    |           |                  |       |            |
|----|-----------|------------------|-------|------------|
| 15 | 20737822  | cg14783259       | Other | GOLGA6L6   |
| 19 | 53642858  | cg15050103       | Other | ZNF347     |
| 18 | 8638712   | ch.18.189560F    | Other | RAB12      |
| 19 | 20231820  | cg06736434       | Other | ZNF90      |
| 2  | 44460827  | cg19769080       | Other | PPM1B      |
| 10 | 78635553  | cg23533270       | Other | KCNMA1     |
| 7  | 117835958 | cg13799581       | Other | NAA38      |
| 6  | 25788879  | cg06885175       | Other | SLC17A1    |
| 10 | 32300362  | ch.10.820670F    | Other | KIF5B      |
| X  | 7270088   | cg10073470       | Other | STS        |
| 4  | 6643382   | cg20272423       | Other | MRFAP1     |
| 2  | 96939558  | ch.2.2007613R    | Other | CIAO1      |
| 15 | 30930499  | cg00067141       | Other | ARHGAP11B  |
| 14 | 24701654  | cg07519822       | Other | GMPR2      |
| 15 | 99789637  | cg25385940       | Other | TTC23      |
| X  | 80457315  | cg21896142       | Other | HMGNS      |
| 18 | 616707    | cg23661343       | Other | CLUL1      |
| X  | 102611415 | cg27464574       | Other | WBP5       |
| X  | 102611412 | cg13208102       | Other | WBP5       |
| 10 | 81107244  | cg16098780       | Other | PPIF       |
| 1  | 85528044  | cg22488158       | Other | WDR63      |
| X  | 99899378  | cg24666876       | Other | SRPX2      |
| X  | 77154996  | cg15830530       | Other | COX7B      |
| 20 | 43835661  | cg11264863       | Other | SEMG1      |
| 4  | 25235765  | cg12931625       | Other | PI4K2B     |
| 8  | 65496126  | cg07205627       | Other | BHLHE22    |
| 12 | 62654245  | cg18915437       | Other | USP15      |
| 8  | 145735102 | cg17958180       | Other | MFSD3      |
| 11 | 55606710  | cg12962308       | Other | OR5D16     |
| 6  | 32634362  | cg05724777       | Other | HLA-DQB1   |
| 3  | 149057820 | cg06305422       | Other | Intergenic |
| 3  | 152871396 | ch.3.3016567F    | Other | Intergenic |
| 2  | 19616327  | cg21039221       | Other | Intergenic |
| 1  | 209365350 | cg22736624       | Other | Intergenic |
| 3  | 116936427 | cg11607648       | Other | Intergenic |
| 8  | 89664399  | ch.8.89733515F   | Other | Intergenic |
| 22 | 32046895  | ch.22.436090R    | Other | Intergenic |
| 11 | 105098067 | ch.11.104603277F | Other | Intergenic |
| 5  | 123635353 | ch.5.2251785F    | Other | Intergenic |
| 13 | 66774231  | ch.13.65672232R  | Other | Intergenic |
| 1  | 11967826  | cg22340067       | Other | Intergenic |
| 15 | 53205349  | ch.15.50992641R  | Other | Intergenic |
| 2  | 129663717 | cg19404692       | Other | Intergenic |
| 10 | 44099144  | cg26270975       | Other | Intergenic |
| 4  | 162116791 | ch.4.162336241R  | Other | Intergenic |

|    |           |                 |       |            |
|----|-----------|-----------------|-------|------------|
| 16 | 49903138  | ch.16.48460639F | Other | Intergenic |
| 2  | 81088536  | ch.2.80942047R  | Other | Intergenic |
| 6  | 26595126  | cg19497998      | Other | Intergenic |
| 2  | 8397810   | cg19256423      | Other | Intergenic |
| 14 | 86554255  | cg13090238      | Other | Intergenic |
| 8  | 37006314  | ch.8.870369R    | Other | Intergenic |
| 6  | 128891095 | cg18500322      | Other | Intergenic |
| 1  | 161339556 | ch.1.159606180R | Other | Intergenic |
| 12 | 85844287  | ch.12.1700408R  | Other | Intergenic |
| 8  | 54188341  | ch.8.54350894R  | Other | Intergenic |
| 14 | 53850070  | ch.14.628538R   | Other | Intergenic |
| 9  | 76690975  | ch.9.919537F    | Other | Intergenic |
| 2  | 227865079 | ch.2.4543734F   | Other | Intergenic |
| 11 | 81757203  | ch.11.1767550R  | Other | Intergenic |
| 18 | 5233979   | cg26881207      | Other | Intergenic |
| X  | 33740873  | cg07983986      | Other | Intergenic |
| 2  | 205130274 | cg17591195      | Other | Intergenic |
| 8  | 119971687 | cg21022303      | Other | Intergenic |
| 2  | 118979739 | cg27358426      | Other | Intergenic |
| 11 | 15363270  | cg09663343      | Other | Intergenic |
| 8  | 2483325   | cg17224775      | Other | Intergenic |
| 5  | 178483871 | cg11282433      | Other | Intergenic |
| 2  | 157192128 | cg12335829      | Other | Intergenic |
| 3  | 137492929 | cg15062059      | Other | Intergenic |
| 3  | 16768672  | ch.3.382096F    | Other | Intergenic |
| 10 | 132834807 | cg11315633      | Other | Intergenic |
| 2  | 9188970   | ch.2.246819F    | Other | Intergenic |
| 15 | 75206153  | ch.15.72993206F | Other | Intergenic |
| 3  | 71636085  | cg06479142      | Other | Intergenic |
| 14 | 54572859  | cg24011936      | Other | Intergenic |
| 6  | 164526833 | cg21567971      | Other | Intergenic |
| 2  | 181200445 | ch.2.180908690F | Other | Intergenic |
| 16 | 13461010  | ch.16.486323F   | Other | Intergenic |
| 8  | 26942425  | cg23760300      | Other | Intergenic |
| 6  | 163768411 | cg20867674      | Other | Intergenic |
| 5  | 60527978  | ch.5.1161320F   | Other | Intergenic |
| 13 | 54817511  | cg09602751      | Other | Intergenic |
| 9  | 97015266  | ch.9.96055087R  | Other | Intergenic |
| 2  | 5374307   | ch.2.154144R    | Other | Intergenic |
| 20 | 11513716  | ch.20.250771F   | Other | Intergenic |
| 5  | 169008308 | cg09106932      | Other | Intergenic |
| 10 | 79401752  | cg27024057      | Other | Intergenic |
| 3  | 179993335 | cg22289155      | Other | Intergenic |
| 12 | 46950853  | cg23677778      | Other | Intergenic |
| 6  | 27243037  | cg21643086      | Other | Intergenic |

|    |           |                 |       |            |
|----|-----------|-----------------|-------|------------|
| 15 | 47565787  | cg10477878      | Other | Intergenic |
| 13 | 87224101  | cg21275368      | Other | Intergenic |
| 19 | 37892209  | cg26361327      | Other | Intergenic |
| 18 | 5888060   | cg06977186      | Other | Intergenic |
| 17 | 39010551  | cg07958689      | Other | Intergenic |
| 6  | 24975742  | ch.6.25083721F  | Other | Intergenic |
| 2  | 14336631  | cg12676991      | Other | Intergenic |
| 6  | 26330589  | cg13569146      | Other | Intergenic |
| 11 | 34608061  | cg22314759      | Other | Intergenic |
| 5  | 3779072   | cg18924848      | Other | Intergenic |
| 16 | 65800351  | ch.16.1425090F  | Other | Intergenic |
| 5  | 180097910 | cg23214352      | Other | Intergenic |
| 14 | 63131938  | cg20468787      | Other | Intergenic |
| 7  | 112135961 | cg23222472      | Other | Intergenic |
| 10 | 86910486  | cg19088503      | Other | Intergenic |
| 6  | 94550257  | ch.6.94606978F  | Other | Intergenic |
| 14 | 88608773  | cg13997469      | Other | Intergenic |
| 7  | 125664997 | ch.7.125452233F | Other | Intergenic |
| 3  | 151555029 | cg21509105      | Other | Intergenic |
| 1  | 2689171   | cg21584800      | Other | Intergenic |
| 7  | 69058543  | cg12999084      | Other | Intergenic |
| 2  | 2757161   | cg18663259      | Other | Intergenic |
| 5  | 3187456   | cg05712938      | Other | Intergenic |
| 15 | 35405377  | ch.15.33192669F | Other | Intergenic |
| 7  | 51658747  | cg12988117      | Other | Intergenic |
| 19 | 42439146  | cg16700658      | Other | Intergenic |
| 2  | 173575577 | cg08641935      | Other | Intergenic |
| 2  | 124194392 | ch.2.123910862R | Other | Intergenic |
| 2  | 227291401 | cg25101764      | Other | Intergenic |
| 5  | 56790874  | cg06821992      | Other | Intergenic |
| 6  | 164614646 | cg10413861      | Other | Intergenic |
| 5  | 1742623   | cg12501402      | Other | Intergenic |
| X  | 124332875 | cg09740875      | Other | Intergenic |
| 3  | 59501481  | cg06146466      | Other | Intergenic |
| 3  | 177416888 | ch.3.3451078R   | Other | Intergenic |
| 6  | 78002283  | cg13663057      | Other | Intergenic |
| 2  | 227342994 | cg13165983      | Other | Intergenic |
| 14 | 98097986  | cg10319905      | Other | Intergenic |
| 11 | 49073835  | cg06445586      | Other | Intergenic |
| 17 | 32633974  | cg12243622      | Other | Intergenic |
| 13 | 55812567  | ch.13.54710568F | Other | Intergenic |
| 3  | 16779726  | cg27614376      | Other | Intergenic |
| 12 | 97951712  | cg27109238      | Other | Intergenic |
| 16 | 52641824  | cg10109421      | Other | Intergenic |
| 13 | 91343397  | ch.13.90141398F | Other | Intergenic |

|    |           |                 |       |            |
|----|-----------|-----------------|-------|------------|
| 13 | 35200731  | ch.13.381084F   | Other | Intergenic |
| 10 | 62576479  | cg09868354      | Other | Intergenic |
| X  | 138525808 | cg09148853      | Other | Intergenic |
| 3  | 8041501   | cg16361249      | Other | Intergenic |
| 10 | 93412294  | cg16377790      | Other | Intergenic |
| 1  | 88167694  | ch.1.87940282F  | Other | Intergenic |
| 21 | 25582901  | cg25946965      | Other | Intergenic |
| 7  | 136322567 | cg22918741      | Other | Intergenic |
| 10 | 54203646  | cg23803709      | Other | Intergenic |
| 7  | 77269758  | ch.7.1700983F   | Other | Intergenic |
| 5  | 72750474  | cg14102740      | Other | Intergenic |
| 13 | 31972778  | ch.13.315182R   | Other | Intergenic |
| 11 | 34608041  | cg16935203      | Other | Intergenic |
| 4  | 24274965  | cg15650745      | Other | Intergenic |
| 8  | 145910623 | cg24497813      | Other | Intergenic |
| X  | 136921659 | cg17550929      | Other | Intergenic |
| 21 | 30188220  | ch.21.284298R   | Other | Intergenic |
| 6  | 67606015  | ch.6.1433484F   | Other | Intergenic |
| 16 | 51475605  | cg27268835      | Other | Intergenic |
| 14 | 86687661  | cg07450805      | Other | Intergenic |
| 5  | 158534530 | cg19070856      | Other | Intergenic |
| 4  | 19777808  | cg24770408      | Other | Intergenic |
| 1  | 171407789 | cg25061682      | Other | Intergenic |
| 3  | 44895117  | ch.3.44870121R  | Other | Intergenic |
| 12 | 116784790 | cg16326611      | Other | Intergenic |
| 13 | 56790593  | cg23817132      | Other | Intergenic |
| 14 | 63112650  | cg11159234      | Other | Intergenic |
| 3  | 70048377  | cg06341047      | Other | Intergenic |
| 2  | 30146945  | cg07060894      | Other | Intergenic |
| 17 | 68663564  | ch.17.66175159R | Other | Intergenic |
| 10 | 10462173  | ch.10.290763R   | Other | Intergenic |
| 2  | 166937869 | cg13875008      | Other | Intergenic |
| 16 | 3201981   | cg06643150      | Other | Intergenic |
| 17 | 37309414  | cg10213328      | Other | Intergenic |
| 12 | 65174660  | cg14078059      | Other | Intergenic |
| 3  | 75862225  | ch.3.1652793F   | Other | Intergenic |
| 3  | 19740602  | cg07849811      | Other | Intergenic |
| X  | 150864703 | cg09026179      | Other | Intergenic |
| 4  | 24043352  | cg25659893      | Other | Intergenic |
| 1  | 214435182 | cg16682225      | Other | Intergenic |
| 11 | 112693829 | cg24986840      | Other | Intergenic |
| 2  | 5689033   | cg13362028      | Other | Intergenic |
| 6  | 166270367 | cg16206344      | Other | Intergenic |
| 15 | 26328941  | cg23527974      | Other | Intergenic |
| 20 | 52793130  | cg25305530      | Other | Intergenic |

|    |           |                 |       |            |
|----|-----------|-----------------|-------|------------|
| 3  | 88930955  | ch.3.89013645F  | Other | Intergenic |
| 10 | 32254360  | ch.10.819441R   | Other | Intergenic |
| 2  | 8416612   | ch.2.224494R    | Other | Intergenic |
| 13 | 47994694  | cg18423626      | Other | Intergenic |
| 11 | 23248542  | ch.11.535384R   | Other | Intergenic |
| 1  | 89027289  | ch.1.88799877F  | Other | Intergenic |
| 3  | 117075024 | cg12837919      | Other | Intergenic |
| 19 | 12904162  | cg15317793      | Other | Intergenic |
| 3  | 175640408 | ch.3.3414728R   | Other | Intergenic |
| X  | 141126129 | ch.X.2058079F   | Other | Intergenic |
| 4  | 125375437 | ch.4.125594887R | Other | Intergenic |
| X  | 34404521  | cg17001761      | Other | Intergenic |
| 12 | 66119400  | cg18758900      | Other | Intergenic |
| 2  | 103593390 | cg15128147      | Other | Intergenic |
| 1  | 14477617  | cg23803120      | Other | Intergenic |
| 6  | 14426636  | ch.6.14534615F  | Other | Intergenic |
| 2  | 21874939  | cg16784006      | Other | Intergenic |
| 2  | 240866924 | cg20598190      | Other | Intergenic |
| 6  | 32774788  | cg22862357      | Other | Intergenic |
| 5  | 36450470  | ch.5.36486227R  | Other | Intergenic |
| 12 | 73586034  | ch.12.71872301F | Other | Intergenic |
| 12 | 49046495  | ch.12.973812R   | Other | Intergenic |
| 12 | 45356182  | ch.12.902977F   | Other | Intergenic |
| 10 | 44782092  | cg10211193      | Other | Intergenic |
| 11 | 86529655  | cg11873113      | Other | Intergenic |
| 14 | 22385791  | cg27268120      | Other | Intergenic |
| 3  | 116996975 | cg10462597      | Other | Intergenic |
| 14 | 78838275  | ch.14.1202858F  | Other | Intergenic |
| 6  | 127741813 | cg12214090      | Other | Intergenic |
| 16 | 49318747  | cg26786800      | Other | Intergenic |
| 5  | 53172915  | ch.5.53208672R  | Other | Intergenic |
| 6  | 139690828 | cg18472160      | Other | Intergenic |
| 11 | 22488445  | cg17344099      | Other | Intergenic |
| 7  | 142421812 | cg19735804      | Other | Intergenic |
| 5  | 1316636   | cg10441424      | Other | Intergenic |
| 11 | 121298154 | cg13683424      | Other | Intergenic |
| X  | 16490374  | ch.X.16400295F  | Other | Intergenic |
| 8  | 130738823 | cg17837330      | Other | Intergenic |
| 13 | 54740236  | cg15157312      | Other | Intergenic |
| 6  | 29621467  | cg14193550      | Other | Intergenic |
| 4  | 43876927  | cg21164813      | Other | Intergenic |
| 5  | 12865512  | cg16107470      | Other | Intergenic |
| 10 | 120437770 | ch.10.2535095F  | Other | Intergenic |
| 16 | 65794720  | cg10129884      | Other | Intergenic |
| 8  | 40059435  | cg20660197      | Other | Intergenic |

|    |           |                 |       |            |
|----|-----------|-----------------|-------|------------|
| 2  | 70530862  | cg17962671      | Other | Intergenic |
| 5  | 6159585   | cg09440150      | Other | Intergenic |
| 10 | 132003854 | cg13800652      | Other | Intergenic |
| 8  | 49891730  | cg08374859      | Other | Intergenic |
| 14 | 35135441  | cg23429457      | Other | Intergenic |
| 13 | 58655819  | cg09034331      | Other | Intergenic |
| 5  | 97834710  | ch.5.97862610R  | Other | Intergenic |
| 7  | 23518135  | cg10437900      | Other | Intergenic |
| 1  | 18238511  | ch.1.620704R    | Other | Intergenic |
| 1  | 174947362 | ch.1.173213985R | Other | Intergenic |
| 5  | 164258317 | ch.5.3099968F   | Other | Intergenic |
| 12 | 112849407 | cg22190774      | Other | Intergenic |
| 15 | 92065606  | cg18774857      | Other | Intergenic |
| 4  | 101220412 | cg27216899      | Other | Intergenic |
| 13 | 39068618  | cg22937571      | Other | Intergenic |

These CpGs were identified DNA methylation data from Yang (2014). The base position is based on National Centre for Biotechnology Information genome build 37.

Supplementary Table 2. List of CpG showing significant correlation with population doubling time of HCT116 cell lines

| <b>CpG</b>      | <b>Location</b> | <b>Gene</b> | <b>PCC</b> | <b>FDR</b>            |
|-----------------|-----------------|-------------|------------|-----------------------|
| cg14143055      | Promoter        | ADAMDEC1    | 0.91       | 0.01                  |
| cg21635584      | Promoter        | UBA3        | 0.9        | 0.01                  |
| cg24074685      | Promoter        | TIA1        | 0.88       | 0.02                  |
| cg07375367      | Promoter        | POLR1D      | 0.85       | 0.03                  |
| cg05782751      | Promoter        | MCTS1       | 0.81       | 0.05                  |
| ch.15.433532F   | Body            | RTF1        | 0.97       | 1.6x10 <sup>-3</sup>  |
| ch.2.2207852R   | Body            | MRPS9       | 0.89       | 0.02                  |
| cg12803053      | Body            | NSMCE2      | -0.87      | 0.02                  |
| ch.5.731560F    | Body            | ADAMTS12    | 0.86       | 0.03                  |
| ch.11.997072R   | Body            | MTCH2       | 0.86       | 0.03                  |
| ch.X.346519R    | Body            | CNKSR2      | 0.84       | 0.03                  |
| ch.1.1168472R   | Body            | THRAP3      | 0.84       | 0.04                  |
| ch.1.385573R    | Body            | PGD         | 0.84       | 0.04                  |
| ch.1.4018176R   | Body            | LGTN        | 0.83       | 0.04                  |
| cg22231602      | Body            | RGS7        | 0.83       | 0.04                  |
| ch.5.3268483F   | Body            | UBTD2       | 0.82       | 0.05                  |
| cg06422757      | Other           | PXT1        | 0.97       | 1.73x10 <sup>-3</sup> |
| cg10783042      | Other           | HDAC6       | 0.93       | 6.20x10 <sup>-3</sup> |
| cg25522119      | Other           | PRKD2       | 0.91       | 0.01                  |
| ch.22.436090R   | Other           | Intergenic  | 0.9        | 0.02                  |
| ch.6.25083721F  | Other           | Intergenic  | 0.88       | 0.02                  |
| ch.12.1700408R  | Other           | Intergenic  | 0.88       | 0.02                  |
| ch.1.88799877F  | Other           | Intergenic  | 0.87       | 0.02                  |
| cg05724777      | Other           | HLA-DQB1    | 0.87       | 0.02                  |
| ch.4.162336241R | Other           | Intergenic  | 0.87       | 0.02                  |
| cg27216899      | Other           | Intergenic  | -0.86      | 0.03                  |
| cg10413861      | Other           | Intergenic  | 0.84       | 0.04                  |
| cg12210527      | Other           | ANAPC5      | 0.83       | 0.04                  |
| ch.21.284298R   | Other           | Intergenic  | 0.83       | 0.04                  |
| cg13569146      | Other           | Intergenic  | 0.83       | 0.04                  |
| cg19832312      | Other           | P4HA1       | 0.82       | 0.05                  |
| cg17550929      | Other           | Intergenic  | 0.82       | 0.05                  |
| cg23429457      | Other           | Intergenic  | 0.82       | 0.05                  |
| cg11159234      | Other           | Intergenic  | 0.8        | 0.05                  |

PCC: Pearson correlation coefficient. FDR: false discovery rate.



Supplementary Table 3. List of CpGs showing a strong correlation (absolute Pearson correlation coefficient  $\geq 0.8$ ) between DNA methylation and corresponding gene expression in HCT116 cell line

| <b>CpG</b> | <b>Gene</b> | <b>Location in the gene</b> | <b>PCC</b> | <b>P</b>              |
|------------|-------------|-----------------------------|------------|-----------------------|
| cg17091793 | FNDC3A      | Promoter                    | 1.00       | 7.30x10 <sup>-4</sup> |
| cg12019961 | ATM         | Promoter                    | -0.99      | 0.01                  |
| cg18959966 | SMARCA1     | Promoter                    | -0.98      | 0.02                  |
| cg07020846 | TLE3        | Promoter                    | 0.98       | 0.02                  |
| cg23126949 | ACCN2       | Promoter                    | 0.97       | 0.03                  |
| cg21388339 | TP73        | Promoter                    | -0.96      | 0.04                  |
| cg22865720 | PRKCZ       | Promoter                    | 0.96       | 0.04                  |
| cg23548487 | ZNF8        | Promoter                    | 0.95       | 0.05                  |
| cg17091793 | FNDC3A      | Promoter                    | -0.95      | 0.05                  |
| cg11404039 | PLRG1       | Promoter                    | -0.95      | 0.05                  |
| cg22603037 | TCHH        | Promoter                    | 0.95       | 0.05                  |
| cg20664654 | AVPR2       | Promoter                    | 0.94       | 0.06                  |
| cg15881990 | PRPF18      | Promoter                    | 0.94       | 0.06                  |
| cg19113954 | SEPSECS     | Promoter                    | 0.93       | 0.07                  |
| cg06484232 | OR52E4      | Promoter                    | -0.93      | 0.07                  |
| cg21472546 | GABRB1      | Promoter                    | 0.93       | 0.07                  |
| cg19113954 | SEPSECS     | Promoter                    | 0.93       | 0.07                  |
| cg11509733 | TSPAN6      | Promoter                    | -0.93      | 0.07                  |
| cg09817993 | GNL3        | Promoter                    | -0.93      | 0.07                  |
| cg10436877 | ABCF2       | Promoter                    | 0.92       | 0.08                  |
| cg23193446 | NMT2        | Promoter                    | 0.91       | 0.09                  |
| cg25198830 | NGFRAP1     | Promoter                    | -0.91      | 0.09                  |
| cg17060964 | OR5AS1      | Promoter                    | -0.91      | 0.09                  |
| cg10646076 | COX7B       | Promoter                    | 0.90       | 0.10                  |
| cg26362852 | RNF145      | Promoter                    | -0.90      | 0.10                  |
| cg11785538 | BCAP29      | Promoter                    | -0.90      | 0.10                  |
| cg23903723 | KIAA1949    | Promoter                    | 0.90       | 0.10                  |
| cg07375367 | POLR1D      | Promoter                    | -0.90      | 0.10                  |
| cg17012513 | ARSF        | Promoter                    | -0.89      | 0.11                  |
| cg15333689 | SLU7        | Promoter                    | 0.89       | 0.11                  |
| cg16792062 | ETS1        | Promoter                    | 0.89       | 0.11                  |
| cg27167381 | MIR506      | Promoter                    | 0.89       | 0.11                  |
| cg26802063 | ARSB        | Promoter                    | -0.89      | 0.11                  |
| cg06148685 | LPAR1       | Promoter                    | 0.89       | 0.11                  |
| cg18016370 | PIGA        | Promoter                    | -0.88      | 0.12                  |
| cg11509733 | TSPAN6      | Promoter                    | -0.87      | 0.13                  |
| cg12912949 | ARVCF       | Promoter                    | -0.87      | 0.13                  |
| cg06698332 | S100A10     | Promoter                    | 0.87       | 0.13                  |
| cg13486082 | NGFRAP1     | Promoter                    | -0.87      | 0.13                  |
| cg26802063 | ARSB        | Promoter                    | 0.87       | 0.13                  |

|               |           |          |       |                       |
|---------------|-----------|----------|-------|-----------------------|
| cg18016370    | PIGA      | Promoter | -0.86 | 0.14                  |
| cg27379065    | ZNF93     | Promoter | -0.85 | 0.15                  |
| cg22865720    | PRKCZ     | Promoter | -0.85 | 0.15                  |
| cg18202167    | OS9       | Promoter | -0.85 | 0.15                  |
| cg26802063    | ARSB      | Promoter | 0.85  | 0.15                  |
| cg25837979    | MIR708    | Promoter | -0.85 | 0.15                  |
| cg23620279    | RPS24     | Promoter | -0.83 | 0.17                  |
| cg10878114    | SLC35F3   | Promoter | 0.82  | 0.18                  |
| cg25198830    | NGFRAP1   | Promoter | -0.82 | 0.18                  |
| cg18750937    | CAND1     | Promoter | 0.82  | 0.18                  |
| cg14004049    | TCEAL8    | Promoter | 0.82  | 0.18                  |
| cg23376554    | TMSB4X    | Promoter | -0.82 | 0.18                  |
| cg08097520    | NTM       | Promoter | 0.82  | 0.18                  |
| cg17275074    | TRPC7     | Promoter | 0.81  | 0.19                  |
| cg10561472    | ZBTB7A    | Promoter | -0.81 | 0.19                  |
| cg07151830    | TCP1      | Promoter | 0.81  | 0.19                  |
| cg17952824    | HNRNPA3P1 | Promoter | -0.81 | 0.19                  |
| cg17952824    | HNRNPA3P1 | Promoter | -0.81 | 0.19                  |
| cg24787081    | CDKN2AIP  | Promoter | 0.81  | 0.19                  |
| cg10828316    | NRXN3     | Promoter | -0.81 | 0.19                  |
| cg16253809    | ARID5B    | Promoter | 0.80  | 0.20                  |
| cg23935054    | OR4A5     | Promoter | 0.80  | 0.20                  |
| cg08099431    | RORA      | Body     | 1.00  | 1.75x10 <sup>-5</sup> |
| cg15794798    | OBFC2A    | Body     | 1.00  | 2.49x10 <sup>-4</sup> |
| ch.22.149158R | UBE2L3    | Body     | -1.00 | 6.18x10 <sup>-4</sup> |
| ch.17.79071R  | SMYD4     | Body     | 1.00  | 9.94x10 <sup>-4</sup> |
| cg11229715    | CUL3      | Body     | -1.00 | 3.21x10 <sup>-3</sup> |
| ch.2.35699F   | SNTG2     | Body     | -1.00 | 3.92x10 <sup>-3</sup> |
| cg06764736    | SOX5      | Body     | 1.00  | 4.33x10 <sup>-3</sup> |
| cg24806812    | GC        | Body     | 0.99  | 0.01                  |
| cg10069677    | HELLS     | Body     | 0.99  | 0.01                  |
| ch.8.362960F  | GC        | Body     | 0.99  | 0.01                  |
| cg13633856    | MBNL3     | Body     | 0.98  | 0.02                  |
| ch.1.2681285F | HIPK1     | Body     | 0.98  | 0.02                  |
| cg13665890    | SLC25A31  | Body     | 0.98  | 0.02                  |
| cg11467638    | SFRP2     | Body     | -0.97 | 0.03                  |
| cg23167425    | ODZ2      | Body     | 0.97  | 0.03                  |
| cg12949466    | RGMB      | Body     | 0.97  | 0.03                  |
| ch.3.343413R  | NR2C2     | Body     | 0.97  | 0.03                  |
| cg24132325    | GC        | Body     | -0.96 | 0.04                  |
| ch.22.909671F | ATXN10    | Body     | -0.96 | 0.04                  |
| cg13689563    | ZNF136    | Body     | 0.96  | 0.04                  |
| ch.16.350833F | USP7      | Body     | 0.96  | 0.04                  |
| ch.22.909671F | ATXN10    | Body     | -0.96 | 0.04                  |
| cg10116443    | SLC22A9   | Body     | -0.95 | 0.05                  |

|                |         |      |       |      |
|----------------|---------|------|-------|------|
| ch.5.3268483F  | UBTD2   | Body | 0.95  | 0.05 |
| cg22834281     | ZNF415  | Body | 0.95  | 0.05 |
| cg21821990     | SNX15   | Body | -0.95 | 0.05 |
| cg18495191     | RPS6KA2 | Body | -0.95 | 0.05 |
| cg08247527     | GC      | Body | 0.95  | 0.05 |
| ch.3.343413R   | NR2C2   | Body | -0.95 | 0.05 |
| cg15691035     | LARS2   | Body | 0.94  | 0.06 |
| cg25486361     | KCNN2   | Body | 0.94  | 0.06 |
| cg20124735     | RORA    | Body | 0.94  | 0.06 |
| cg16631432     | SCN3A   | Body | -0.93 | 0.07 |
| ch.6.2623783F  | MAP7    | Body | -0.93 | 0.07 |
| ch.4.1647744F  | WDFY3   | Body | -0.92 | 0.08 |
| ch.4.1647744F  | WDFY3   | Body | -0.92 | 0.08 |
| cg24132325     | GC      | Body | 0.92  | 0.08 |
| cg06103928     | DLC1    | Body | -0.92 | 0.08 |
| ch.17.1348593F | MBTD1   | Body | 0.92  | 0.08 |
| cg25497053     | WWC3    | Body | 0.92  | 0.08 |
| ch.12.1023240F | LIMA1   | Body | 0.92  | 0.08 |
| cg23024358     | SORCS1  | Body | 0.92  | 0.08 |
| cg08247527     | GC      | Body | 0.92  | 0.08 |
| cg19753609     | NRXN3   | Body | -0.92 | 0.08 |
| cg15651267     | ODZ2    | Body | 0.92  | 0.08 |
| cg15160274     | GC      | Body | 0.92  | 0.08 |
| cg15160274     | SGCD    | Body | 0.92  | 0.08 |
| ch.13.865492R  | DIAPH3  | Body | 0.92  | 0.08 |
| cg15160274     | GC      | Body | 0.92  | 0.08 |
| ch.11.1702122F | GAB2    | Body | 0.92  | 0.08 |
| cg18495191     | RPS6KA2 | Body | -0.92 | 0.08 |
| ch.1.2681285F  | HIPK1   | Body | -0.92 | 0.08 |
| cg09236445     | PDZRN3  | Body | -0.91 | 0.09 |
| ch.1.2681285F  | HIPK1   | Body | -0.91 | 0.09 |
| cg23530596     | SLC12A1 | Body | 0.90  | 0.10 |
| ch.2.2207852R  | MRPS9   | Body | -0.90 | 0.10 |
| ch.4.2245532F  | PRDM5   | Body | -0.90 | 0.10 |
| cg07405178     | RARB    | Body | -0.90 | 0.10 |
| ch.20.221631R  | ANKRD5  | Body | -0.89 | 0.11 |
| cg12709692     | KCTD8   | Body | -0.89 | 0.11 |
| cg23290313     | ST3GAL3 | Body | 0.89  | 0.11 |
| cg14520512     | MBNL3   | Body | 0.89  | 0.11 |
| cg09236445     | PDZRN3  | Body | -0.89 | 0.11 |
| cg09811510     | SCHIP1  | Body | 0.89  | 0.11 |
| cg07491444     | ARL6IP6 | Body | -0.88 | 0.12 |
| cg21478123     | GMDS    | Body | -0.88 | 0.12 |
| ch.3.3822654R  | ATP13A3 | Body | -0.88 | 0.12 |
| cg17165836     | AFF3    | Body | 0.88  | 0.12 |

|                |          |       |       |      |
|----------------|----------|-------|-------|------|
| ch.1.953398R   | TRNAU1AP | Body  | -0.88 | 0.12 |
| cg10626169     | ABCA13   | Body  | 0.88  | 0.12 |
| cg18495191     | RPS6KA2  | Body  | -0.88 | 0.12 |
| ch.13.865492R  | DIAPH3   | Body  | -0.88 | 0.12 |
| cg13298997     | PDE1C    | Body  | -0.88 | 0.12 |
| cg18986048     | MYPN     | Body  | -0.87 | 0.13 |
| cg11019127     | CADM1    | Body  | -0.87 | 0.13 |
| cg25702790     | GNAI1    | Body  | -0.87 | 0.13 |
| ch.5.1443044F  | AGGF1    | Body  | -0.87 | 0.13 |
| cg15454195     | NPAS3    | Body  | -0.87 | 0.13 |
| ch.13.865492R  | DIAPH3   | Body  | 0.87  | 0.13 |
| ch.9.1152820R  | AGTPBP1  | Body  | -0.87 | 0.13 |
| cg24132325     | GC       | Body  | -0.86 | 0.14 |
| ch.12.1019410F | LASS5    | Body  | 0.84  | 0.16 |
| ch.4.1647744F  | WDFY3    | Body  | 0.84  | 0.16 |
| ch.4.1647744F  | WDFY3    | Body  | 0.84  | 0.16 |
| ch.8.362960F   | GC       | Body  | -0.84 | 0.16 |
| ch.8.362960F   | SGCZ     | Body  | -0.84 | 0.16 |
| ch.4.2065340F  | CCDC109B | Body  | 0.83  | 0.17 |
| cg07491444     | ARL6IP6  | Body  | -0.82 | 0.18 |
| ch.20.1002962F | ZMYND8   | Body  | -0.82 | 0.18 |
| cg07276831     | FAT3     | Body  | 0.82  | 0.18 |
| cg24082347     | ORAI1    | Body  | 0.81  | 0.19 |
| ch.8.903080R   | WHSC1L1  | Body  | 0.81  | 0.19 |
| cg24806812     | GC       | Body  | 0.81  | 0.19 |
| cg15459537     | ARPP-21  | Body  | 0.80  | 0.20 |
| cg24132325     | GC       | Body  | 0.80  | 0.20 |
| cg24132325     | SGCD     | Body  | 0.80  | 0.20 |
| cg13361307     | AFF3     | Body  | 0.80  | 0.20 |
| cg25609301     | KCNH5    | Body  | 0.80  | 0.20 |
| ch.12.897509F  | NELL2    | Body  | 0.80  | 0.20 |
| cg24492140     | RFC3     | Body  | -0.80 | 0.20 |
| ch.1.705736F   | HP1BP3   | Body  | 0.80  | 0.20 |
| cg19210276     | CTNND1   | Other | -0.98 | 0.02 |
| cg11113650     | CCNB3    | Other | 0.98  | 0.02 |
| ch.2.2007613R  | CIAO1    | Other | 0.97  | 0.03 |
| cg13208102     | WBP5     | Other | 0.97  | 0.03 |
| cg25385940     | TTC23    | Other | -0.97 | 0.03 |
| cg19210276     | CTNND1   | Other | -0.96 | 0.04 |
| cg17039262     | SETD4    | Other | 0.96  | 0.04 |
| ch.18.189560F  | RAB12    | Other | -0.96 | 0.04 |
| cg22585269     | CHEK2    | Other | 0.96  | 0.04 |
| cg15558299     | ELK4     | Other | 0.95  | 0.05 |
| cg08155759     | PEG3     | Other | 0.95  | 0.05 |
| cg11920737     | SERTAD2  | Other | 0.93  | 0.07 |

|                |          |       |       |      |
|----------------|----------|-------|-------|------|
| cg25385940     | TTC23    | Other | 0.93  | 0.07 |
| cg06422757     | PXT1     | Other | -0.93 | 0.07 |
| cg07519822     | GMPR2    | Other | -0.93 | 0.07 |
| cg21880712     | ZNF136   | Other | 0.93  | 0.07 |
| cg20522855     | DMD      | Other | -0.92 | 0.08 |
| cg22585269     | CHEK2    | Other | -0.91 | 0.09 |
| cg17039262     | SETD4    | Other | -0.91 | 0.09 |
| cg27464574     | WBP5     | Other | 0.91  | 0.09 |
| cg19023258     | ZNF493   | Other | 0.90  | 0.10 |
| cg05723953     | HMGB4    | Other | -0.89 | 0.11 |
| cg20522855     | DMD      | Other | 0.88  | 0.12 |
| cg24011341     | SOX5     | Other | 0.88  | 0.12 |
| ch.20.1062061F | STAU1    | Other | 0.87  | 0.13 |
| cg08456555     | ARHGAP6  | Other | 0.86  | 0.14 |
| cg12931625     | PI4K2B   | Other | -0.85 | 0.15 |
| cg09208571     | MAGED2   | Other | 0.85  | 0.15 |
| cg18132851     | ESR1     | Other | 0.84  | 0.16 |
| cg18198306     | FBXO5    | Other | -0.84 | 0.16 |
| cg20528338     | OSBPL1A  | Other | -0.84 | 0.16 |
| cg07099245     | BCOR     | Other | 0.83  | 0.17 |
| cg05724777     | HLA-DQB1 | Other | -0.83 | 0.17 |
| cg19769080     | PPM1B    | Other | -0.81 | 0.19 |
| cg26142661     | ZMAT1    | Other | -0.81 | 0.19 |
| ch.10.820670F  | KIF5B    | Other | 0.81  | 0.19 |
| cg12962308     | OR5D16   | Other | -0.80 | 0.20 |
| cg15830530     | COX7B    | Other | 0.80  | 0.20 |
| cg26856631     | LSM5     | Other | -0.80 | 0.20 |

PCC: Pearson correlation coefficient.

Supplementary Table 4. List of CpGs that showed strong correlation with gene expression and DNA methylation in HCT116 cell lines and showed differential methylated in TCGA colon cancer tissue as compare to adjacent healthy tissues

| CpG        | Location in the gene | Gene      | Average methylation in cancer | Average methylation in normol | difference ( $\Delta\beta$ ) | FDR                    |
|------------|----------------------|-----------|-------------------------------|-------------------------------|------------------------------|------------------------|
| cg10828316 | Promoter             | NRXN3     | 0.43                          | 0.82                          | -0.39                        | 3.45x10 <sup>-10</sup> |
| cg16792062 | Promoter             | ETS1      | 0.51                          | 0.87                          | -0.36                        | 4.59x10 <sup>-10</sup> |
| cg14597388 | Promoter             | GZMK      | 0.34                          | 0.63                          | -0.29                        | 5.59x10 <sup>-10</sup> |
| cg17060964 | Promoter             | OR5AS1    | 0.29                          | 0.67                          | -0.38                        | 8.14x10 <sup>-10</sup> |
| cg22603037 | Promoter             | TCHH      | 0.55                          | 0.87                          | -0.32                        | 1.60x10 <sup>-9</sup>  |
| cg22155405 | Promoter             | LOC284441 | 0.45                          | 0.75                          | -0.30                        | 4.05x10 <sup>-9</sup>  |
| cg05788138 | Promoter             | OR5L1     | 0.30                          | 0.56                          | -0.26                        | 4.85x10 <sup>-9</sup>  |
| cg14640659 | Promoter             | PCDHB13   | 0.32                          | 0.58                          | -0.27                        | 6.30x10 <sup>-9</sup>  |
| cg10878114 | Promoter             | SLC35F3   | 0.68                          | 0.43                          | 0.25                         | 6.51x10 <sup>-8</sup>  |
| cg23935054 | Promoter             | OR4A5     | 0.13                          | 0.21                          | -0.07                        | 1.81x10 <sup>-7</sup>  |
| cg24109012 | Promoter             | ZNF709    | 0.53                          | 0.79                          | -0.26                        | 2.06x10 <sup>-7</sup>  |
| cg14696870 | Promoter             | FCER1A    | 0.57                          | 0.86                          | -0.29                        | 7.63x10 <sup>-7</sup>  |
| cg23434090 | Promoter             | OR51L1    | 0.74                          | 0.90                          | -0.16                        | 2.33x10 <sup>-6</sup>  |
| cg26155802 | Promoter             | OR4F6     | 0.64                          | 0.87                          | -0.24                        | 5.84x10 <sup>-6</sup>  |
| cg08060810 | Promoter             | OR5D18    | 0.77                          | 0.92                          | -0.15                        | 3.74x10 <sup>-5</sup>  |
| cg16395953 | Promoter             | IFIT1     | 0.09                          | 0.07                          | 0.02                         | 1.24x10 <sup>-4</sup>  |
| cg09073052 | Promoter             | PLEKHM2   | 0.15                          | 0.11                          | 0.03                         | 2.85E-04               |
| cg17952824 | Promoter             | HNRNPA3P1 | 0.38                          | 0.52                          | -0.14                        | 6.25x10 <sup>-4</sup>  |
| cg14276619 | Promoter             | HRK       | 0.28                          | 0.17                          | 0.10                         | 6.42x10 <sup>-4</sup>  |
| cg13486082 | Promoter             | NGFRAP1   | 0.78                          | 0.90                          | -0.13                        | 1.04x10 <sup>-3</sup>  |
| cg27379065 | Promoter             | ZNF93     | 0.15                          | 0.09                          | 0.06                         | 1.16x10 <sup>-3</sup>  |
| cg13053563 | Promoter             | OR2T1     | 0.73                          | 0.86                          | -0.12                        | 1.58x10 <sup>-3</sup>  |
| cg05884522 | Promoter             | NOL7      | 0.05                          | 0.06                          | -0.01                        | 2.21x10 <sup>-3</sup>  |
| cg26362852 | Promoter             | RNF145    | 0.15                          | 0.11                          | 0.04                         | 2.50x10 <sup>-3</sup>  |
| cg22845496 | Promoter             | UNC13C    | 0.74                          | 0.87                          | -0.13                        | 2.74x10 <sup>-3</sup>  |
| cg20485144 | Promoter             | ID3       | 0.15                          | 0.12                          | 0.03                         | 3.78x10 <sup>-3</sup>  |
| cg07020846 | Promoter             | TLE3      | 0.09                          | 0.08                          | 0.01                         | 3.84x10 <sup>-3</sup>  |
| cg23548487 | Promoter             | ZNF8      | 0.08                          | 0.04                          | 0.04                         | 4.62x10 <sup>-3</sup>  |
| cg07312099 | Promoter             | ASAH1     | 0.13                          | 0.10                          | 0.03                         | 5.46x10 <sup>-3</sup>  |
| cg13675958 | Promoter             | C13orf27  | 0.09                          | 0.04                          | 0.05                         | 7.44x10 <sup>-3</sup>  |
| cg11471799 | Promoter             | DIXDC1    | 0.14                          | 0.10                          | 0.04                         | 7.74x10 <sup>-3</sup>  |
| cg13108328 | Promoter             | PLEKHA5   | 0.06                          | 0.07                          | -0.01                        | 8.85x10 <sup>-3</sup>  |
| cg11785538 | Promoter             | BCAP29    | 0.24                          | 0.29                          | -0.05                        | 0.01                   |
| cg25016070 | Promoter             | PKM2      | 0.13                          | 0.10                          | 0.02                         | 0.01                   |
| cg25198830 | Promoter             | NGFRAP1   | 0.77                          | 0.87                          | -0.10                        | 0.01                   |
| cg17012513 | Promoter             | ARSF      | 0.21                          | 0.24                          | -0.03                        | 0.02                   |
| cg12583184 | Promoter             | SLC24A6   | 0.23                          | 0.19                          | 0.03                         | 0.03                   |

|            |          |           |      |      |       |                        |
|------------|----------|-----------|------|------|-------|------------------------|
| cg17275074 | Promoter | TRPC7     | 0.23 | 0.24 | -0.01 | 0.03                   |
| cg07494499 | Body     | NXN       | 0.36 | 0.69 | -0.34 | 3.45x10 <sup>-10</sup> |
| cg24132325 | Body     | SGCD      | 0.44 | 0.85 | -0.41 | 3.45x10 <sup>-10</sup> |
| cg23530596 | Body     | SLC12A1   | 0.27 | 0.62 | -0.35 | 3.92x10 <sup>-10</sup> |
| cg15651267 | Body     | ODZ2      | 0.43 | 0.83 | -0.40 | 4.05x10 <sup>-10</sup> |
| cg16522250 | Body     | CNTN6     | 0.39 | 0.84 | -0.44 | 6.83x10 <sup>-10</sup> |
| cg21222888 | Body     | GPC6      | 0.23 | 0.52 | -0.29 | 6.83x10 <sup>-10</sup> |
| cg19017553 | Body     | PARD3     | 0.46 | 0.79 | -0.33 | 6.83x10 <sup>-10</sup> |
| cg06707406 | Body     | NRXN1     | 0.44 | 0.79 | -0.36 | 8.14x10 <sup>-10</sup> |
| cg17937340 | Body     | COL6A6    | 0.56 | 0.85 | -0.29 | 8.28x10 <sup>-10</sup> |
| cg07977614 | Body     | PLD5      | 0.17 | 0.51 | -0.33 | 8.76x10 <sup>-10</sup> |
| cg22092126 | Body     | AFF3      | 0.39 | 0.75 | -0.35 | 9.82x10 <sup>-10</sup> |
| cg24806812 | Body     | GC        | 0.60 | 0.88 | -0.28 | 4.85x10 <sup>-9</sup>  |
| cg16253976 | Body     | ADCY2     | 0.45 | 0.80 | -0.35 | 5.30x10 <sup>-9</sup>  |
| cg19567866 | Body     | SPOCK1    | 0.50 | 0.85 | -0.36 | 5.30x10 <sup>-9</sup>  |
| cg16051561 | Body     | CTNND2    | 0.30 | 0.61 | -0.30 | 6.30x10 <sup>-9</sup>  |
| cg18413062 | Body     | OPCML     | 0.36 | 0.67 | -0.30 | 8.82x10 <sup>-9</sup>  |
| cg23024358 | Body     | SORCS1    | 0.65 | 0.83 | -0.18 | 9.70x10 <sup>-9</sup>  |
| cg17519477 | Body     | NRG3      | 0.25 | 0.52 | -0.26 | 9.83x10 <sup>-9</sup>  |
| cg09811510 | Body     | SCHIP1    | 0.31 | 0.67 | -0.36 | 1.01x10 <sup>-8</sup>  |
| cg16631432 | Body     | SCN3A     | 0.46 | 0.77 | -0.31 | 1.84x10 <sup>-8</sup>  |
| cg25361651 | Body     | DEFB115   | 0.15 | 0.29 | -0.13 | 3.40x10 <sup>-8</sup>  |
| cg10626169 | Body     | ABCA13    | 0.48 | 0.81 | -0.34 | 4.82x10 <sup>-8</sup>  |
| cg22834281 | Body     | ZNF415    | 0.64 | 0.92 | -0.28 | 5.98x10 <sup>-8</sup>  |
| cg23290313 | Body     | ST3GAL3   | 0.53 | 0.79 | -0.26 | 6.40x10 <sup>-8</sup>  |
| cg27583655 | Body     | PDE4D     | 0.40 | 0.63 | -0.24 | 6.97x10 <sup>-8</sup>  |
| cg19753609 | Body     | NRXN3     | 0.52 | 0.79 | -0.28 | 8.65x10 <sup>-8</sup>  |
| cg07467482 | Body     | DPP6      | 0.49 | 0.79 | -0.30 | 1.81x10 <sup>-7</sup>  |
| cg08238568 | Body     | RGS7      | 0.58 | 0.83 | -0.25 | 2.16x10 <sup>-7</sup>  |
| cg26349484 | Body     | SORCS3    | 0.24 | 0.43 | -0.18 | 7.27x10 <sup>-7</sup>  |
| cg19093405 | Body     | CACNA2D3  | 0.78 | 0.91 | -0.13 | 1.56x10 <sup>-7</sup>  |
| cg08099431 | Body     | RORA      | 0.73 | 0.91 | -0.18 | 3.11x10 <sup>-6</sup>  |
| cg18818949 | Body     | NRXN3     | 0.38 | 0.60 | -0.22 | 3.17x10 <sup>-6</sup>  |
| cg15459537 | Body     | ARPP-21   | 0.35 | 0.53 | -0.17 | 1.31x10 <sup>-5</sup>  |
| cg15826891 | Body     | LOC399959 | 0.57 | 0.76 | -0.19 | 1.83x10 <sup>-5</sup>  |
| cg12033248 | Body     | KCNU1     | 0.65 | 0.88 | -0.23 | 2.67x10 <sup>-5</sup>  |
| cg11458498 | Body     | SLIT3     | 0.39 | 0.55 | -0.16 | 6.15x10 <sup>-5</sup>  |
| cg06764736 | Body     | SOX5      | 0.84 | 0.93 | -0.10 | 8.88x10 <sup>-5</sup>  |
| cg25461513 | Body     | CADM1     | 0.82 | 0.90 | -0.08 | 1.33x10 <sup>-4</sup>  |
| cg16819888 | Body     | AUTS2     | 0.78 | 0.91 | -0.13 | 1.49x10 <sup>-4</sup>  |
| cg10116443 | Body     | SLC22A9   | 0.73 | 0.91 | -0.18 | 1.62x10 <sup>-4</sup>  |
| cg15794798 | Body     | OBFC2A    | 0.14 | 0.11 | 0.04  | 1.67x10 <sup>-4</sup>  |
| cg22359828 | Body     | CACNA1E   | 0.22 | 0.31 | -0.09 | 2.85x10 <sup>-4</sup>  |
| cg25486361 | Body     | KCNN2     | 0.69 | 0.82 | -0.13 | 3.06x10 <sup>-4</sup>  |
| cg06103928 | Body     | DLC1      | 0.74 | 0.86 | -0.11 | 3.77x10 <sup>-4</sup>  |

|                |      |          |      |      |       |                       |
|----------------|------|----------|------|------|-------|-----------------------|
| cg16242106     | Body | UBE2Q2   | 0.17 | 0.12 | 0.06  | 3.77x10 <sup>-4</sup> |
| cg09566894     | Body | TSHZ2    | 0.67 | 0.87 | -0.20 | 4.07x10 <sup>-4</sup> |
| cg16752940     | Body | LSAMP    | 0.81 | 0.90 | -0.09 | 5.37x10 <sup>-4</sup> |
| ch.20.1002962F | Body | ZMYND8   | 0.17 | 0.23 | -0.06 | 7.60x10 <sup>-4</sup> |
| cg22872195     | Body | UNC5D    | 0.41 | 0.56 | -0.15 | 1.30x10 <sup>-3</sup> |
| cg14773588     | Body | PHACTR1  | 0.75 | 0.86 | -0.11 | 1.34x10 <sup>-3</sup> |
| cg07405178     | Body | RARB     | 0.19 | 0.14 | 0.05  | 1.67x10 <sup>-3</sup> |
| cg19053479     | Body | FAM188A  | 0.16 | 0.13 | 0.03  | 2.45x10 <sup>-3</sup> |
| ch.22.909671F  | Body | ATXN10   | 0.14 | 0.10 | 0.04  | 2.50x10 <sup>-3</sup> |
| ch.4.1647744F  | Body | WDFY3    | 0.10 | 0.07 | 0.03  | 2.62x10 <sup>-3</sup> |
| ch.3.343413R   | Body | NR2C2    | 0.10 | 0.07 | 0.03  | 3.10x10 <sup>-3</sup> |
| ch.4.2245532F  | Body | PRDM5    | 0.09 | 0.07 | 0.02  | 4.25x10 <sup>-3</sup> |
| cg12708807     | Body | CRYZL1   | 0.10 | 0.08 | 0.02  | 4.34x10 <sup>-3</sup> |
| ch.8.343778F   | Body | DLC1     | 0.14 | 0.10 | 0.04  | 6.29x10 <sup>-3</sup> |
| cg16758887     | Body | LOC93622 | 0.12 | 0.09 | 0.02  | 8.01x10 <sup>-3</sup> |
| cg22892110     | Body | MAPK15   | 0.26 | 0.16 | 0.10  | 8.43x10 <sup>-3</sup> |
| cg21324884     | Body | MIR548A2 | 0.62 | 0.76 | -0.14 | 9.40x10 <sup>-3</sup> |
| cg14520512     | Body | MBNL3    | 0.59 | 0.70 | -0.11 | 0.01                  |
| cg06938601     | Body | TCERG1L  | 0.37 | 0.45 | -0.08 | 0.01                  |
| cg10069677     | Body | HELLS    | 0.14 | 0.11 | 0.03  | 0.02                  |
| cg06721860     | Body | SYT10    | 0.79 | 0.87 | -0.08 | 0.02                  |
| cg21518865     | Body | ST8SIA3  | 0.47 | 0.57 | -0.10 | 0.02                  |
| ch.1.1168472R  | Body | THRAP3   | 0.08 | 0.07 | 0.01  | 0.02                  |
| ch.1.705736F   | Body | HP1BP3   | 0.12 | 0.09 | 0.03  | 0.02                  |
| cg07097925     | Body | ICAM5    | 0.10 | 0.04 | 0.06  | 0.03                  |
| cg25486749     | Body | TCERG1L  | 0.89 | 0.94 | -0.04 | 0.04                  |
| ch.2.4215183F  | Body | CPS1     | 0.10 | 0.08 | 0.02  | 0.04                  |
| ch.15.433532F  | Body | RTF1     | 0.19 | 0.17 | 0.02  | 0.04                  |
| cg07293993     | Body | MTHFS    | 0.17 | 0.14 | 0.03  | 0.04                  |

FDR: False discovery rate. Wilcoxon non-parametric test was used to calculate the p value.



Supplementary Table 5. Differential expression analysis of genes corresponding to differentially methylated CpGs at promoter and gene body area in TCGA colon cancer data

| Gene      | CpG            | Location in the gene | Average expression in cancer | Average expression in normal | Fold change | FDR                    |
|-----------|----------------|----------------------|------------------------------|------------------------------|-------------|------------------------|
| FCER1A    | cg14696870     | Promoter             | -0.20                        | 1.33                         | -1.52       | 8.63x10 <sup>-9</sup>  |
| NOL7      | cg05884522     | Promoter             | 0.18                         | -1.21                        | 1.38        | 1.13x10 <sup>-8</sup>  |
| C13orf27  | cg13675958     | Promoter             | 0.15                         | -1.09                        | 1.25        | 2.43x10 <sup>-8</sup>  |
| PKM2      | cg25016070     | Promoter             | 0.19                         | -1.16                        | 1.35        | 2.43x10 <sup>-8</sup>  |
| HNRNPA3P1 | cg17952824     | Promoter             | 0.16                         | -1.19                        | 1.36        | 2.33x10 <sup>-7</sup>  |
| ID3       | cg20485144     | Promoter             | -0.12                        | 1.01                         | -1.12       | 4.14x10 <sup>-6</sup>  |
| ZNF8      | cg23548487     | Promoter             | 0.15                         | -0.84                        | 1.00        | 7.29x10 <sup>-6</sup>  |
| SLC24A6   | cg12583184     | Promoter             | -0.12                        | 0.80                         | -0.92       | 1.43x10 <sup>-5</sup>  |
| SLC35F3   | cg10878114     | Promoter             | -0.10                        | 0.81                         | -0.92       | 2.37x10 <sup>-5</sup>  |
| DIXDC1    | cg11471799     | Promoter             | -0.14                        | 0.92                         | -1.07       | 2.53x10 <sup>-5</sup>  |
| IFIT1     | cg16395953     | Promoter             | -0.11                        | 0.67                         | -0.77       | 1.08x10 <sup>-3</sup>  |
| PLEKHA5   | cg13108328     | Promoter             | 0.07                         | -0.56                        | 0.63        | 1.29x10 <sup>-3</sup>  |
| TLE3      | cg07020846     | Promoter             | -0.06                        | 0.49                         | -0.55       | 4.95x10 <sup>-3</sup>  |
| ZNF93     | cg27379065     | Promoter             | 0.06                         | -0.30                        | 0.36        | 4.95x10 <sup>-3</sup>  |
| ASAH1     | cg07312099     | Promoter             | -0.06                        | 0.57                         | -0.63       | 0.01                   |
| ETS1      | cg16792062     | Promoter             | -0.06                        | 0.54                         | -0.60       | 0.01                   |
| ZNF709    | cg24109012     | Promoter             | 0.04                         | -0.41                        | 0.45        | 0.01                   |
| BCAP29    | cg11785538     | Promoter             | -0.06                        | 0.42                         | -0.48       | 0.03                   |
| GZMK      | cg14597388     | Promoter             | -0.06                        | 0.45                         | -0.51       | 0.03                   |
| HELLS     | cg10069677     | Genebody             | 0.26                         | -1.64                        | 1.90        | 3.98x10 <sup>-10</sup> |
| NRXN1     | cg06707406     | Genebody             | -0.24                        | 1.70                         | -1.94       | 3.98x10 <sup>-10</sup> |
| UNC5D     | cg22872195     | Genebody             | -0.23                        | 1.59                         | -1.82       | 3.98x10 <sup>-10</sup> |
| CTNND2    | cg16051561     | Genebody             | -0.25                        | 1.69                         | -1.94       | 5.10x10 <sup>-10</sup> |
| SCN3A     | cg16631432     | Genebody             | -0.17                        | 1.27                         | -1.44       | 5.53x10 <sup>-10</sup> |
| MAPK15    | cg22892110     | Genebody             | 0.20                         | -1.35                        | 1.55        | 8.40x10 <sup>-10</sup> |
| SORCS1    | cg23024358     | Genebody             | -0.20                        | 1.45                         | -1.66       | 1.08x10 <sup>-9</sup>  |
| DPP6      | cg07467482     | Genebody             | -0.24                        | 1.48                         | -1.72       | 1.25x10 <sup>-9</sup>  |
| AFF3      | cg22092126     | Genebody             | -0.21                        | 1.28                         | -1.48       | 2.75x10 <sup>-9</sup>  |
| PDE4D     | cg27583655     | Genebody             | -0.15                        | 1.20                         | -1.35       | 1.31x10 <sup>-8</sup>  |
| SLIT3     | cg11458498     | Genebody             | -0.17                        | 1.27                         | -1.44       | 1.31x10 <sup>-8</sup>  |
| ZNF415    | cg22834281     | Genebody             | -0.15                        | 1.08                         | -1.22       | 1.15x10 <sup>-6</sup>  |
| ADCY2     | cg16253976     | Genebody             | -0.14                        | 1.02                         | -1.17       | 2.07x10 <sup>-6</sup>  |
| ST3GAL3   | cg23290313     | Genebody             | -0.15                        | 0.99                         | -1.13       | 2.35x10 <sup>-6</sup>  |
| NRG3      | cg17519477     | Genebody             | -0.17                        | 1.12                         | -1.29       | 2.54x10 <sup>-6</sup>  |
| CRYZL1    | cg12708807     | Genebody             | -0.17                        | 0.91                         | -1.07       | 4.11x10 <sup>-6</sup>  |
| ZMYND8    | ch.20.1002962F | Genebody             | 0.13                         | -0.94                        | 1.07        | 4.85x10 <sup>-6</sup>  |
| MBNL3     | cg13633856     | Genebody             | -0.12                        | 0.81                         | -0.93       | 1.73x10 <sup>-5</sup>  |
| CACNA2D3  | cg19093405     | Genebody             | -0.12                        | 0.87                         | -0.98       | 3.21x10 <sup>-5</sup>  |
| LOC93622  | cg16758887     | Genebody             | 0.13                         | -0.69                        | 0.82        | 5.30x10 <sup>-5</sup>  |

|           |               |          |       |       |       |                       |
|-----------|---------------|----------|-------|-------|-------|-----------------------|
| SOX5      | cg06764736    | Genebody | -0.11 | 0.80  | -0.91 | 8.41x10 <sup>-5</sup> |
| ODZ2      | cg23167425    | Genebody | -0.10 | 0.72  | -0.82 | 1.76x10 <sup>-4</sup> |
| CADM1     | cg11019127    | Genebody | -0.08 | 0.67  | -0.75 | 5.54x10 <sup>-4</sup> |
| AUTS2     | cg09703727    | Genebody | 0.07  | -0.40 | 0.46  | 5.76x10 <sup>-4</sup> |
| GPC6      | cg21222888    | Genebody | -0.09 | 0.75  | -0.85 | 5.76x10 <sup>-4</sup> |
| LOC399959 | cg15826891    | Genebody | -0.10 | 0.76  | -0.85 | 6.31x10 <sup>-4</sup> |
| RORA      | cg08099431    | Genebody | -0.07 | 0.63  | -0.71 | 1.91x10 <sup>-3</sup> |
| THRAP3    | ch.1.1168472R | Genebody | 0.10  | -0.65 | 0.76  | 2.24x10 <sup>-3</sup> |
| ATXN10    | ch.22.909671F | Genebody | 0.08  | -0.57 | 0.65  | 2.37x10 <sup>-3</sup> |
| SCHIP1    | cg09811510    | Genebody | -0.07 | 0.72  | -0.80 | 4.40x10 <sup>-3</sup> |
| TCERG1L   | cg06938601    | Genebody | -0.07 | 0.64  | -0.71 | 0.01                  |
| DLC1      | cg06103928    | Genebody | -0.06 | 0.65  | -0.71 | 0.01                  |
| OBFC2A    | cg15794798    | Genebody | 0.10  | -0.51 | 0.61  | 0.01                  |
| PHACTR1   | cg14773588    | Genebody | -0.05 | 0.48  | -0.53 | 0.02                  |
| MTHFS     | cg07293993    | Genebody | 0.07  | -0.39 | 0.46  | 0.04                  |
| ICAM5     | cg07097925    | Genebody | 0.10  | -0.44 | 0.54  | 0.04                  |
| COL6A6    | cg17937340    | Genebody | 0.08  | -0.43 | 0.51  | 0.05                  |
| SGCD      | cg24132325    | Genebody | -0.05 | 0.50  | -0.54 | 0.05                  |
| FCER1A    | cg14696870    | Promoter | -0.20 | 1.33  | -1.52 | 8.63x10 <sup>-9</sup> |
| NOL7      | cg05884522    | Promoter | 0.18  | -1.21 | 1.38  | 1.13x10 <sup>-8</sup> |
| C13orf27  | cg13675958    | Promoter | 0.15  | -1.09 | 1.25  | 2.43x10 <sup>-8</sup> |
| PKM2      | cg25016070    | Promoter | 0.19  | -1.16 | 1.35  | 2.43x10 <sup>-8</sup> |
| HNRNPA3P1 | cg17952824    | Promoter | 0.16  | -1.19 | 1.36  | 2.33x10 <sup>-7</sup> |
| ID3       | cg20485144    | Promoter | -0.12 | 1.01  | -1.12 | 4.14x10 <sup>-6</sup> |
| ZNF8      | cg23548487    | Promoter | 0.15  | -0.84 | 1.00  | 7.29x10 <sup>-6</sup> |
| SLC24A6   | cg12583184    | Promoter | -0.12 | 0.80  | -0.92 | 1.43x10 <sup>-5</sup> |
| SLC35F3   | cg10878114    | Promoter | -0.10 | 0.81  | -0.92 | 2.37x10 <sup>-5</sup> |
| DIXDC1    | cg11471799    | Promoter | -0.14 | 0.92  | -1.07 | 2.53x10 <sup>-5</sup> |
| IFIT1     | cg16395953    | Promoter | -0.11 | 0.67  | -0.77 | 1.08x10 <sup>-3</sup> |
| PLEKHA5   | cg13108328    | Promoter | 0.07  | -0.56 | 0.63  | 1.29x10 <sup>-3</sup> |
| TLE3      | cg07020846    | Promoter | -0.06 | 0.49  | -0.55 | 4.95x10 <sup>-3</sup> |
| ZNF93     | cg27379065    | Promoter | 0.06  | -0.30 | 0.36  | 4.95x10 <sup>-3</sup> |
| ASAHI     | cg07312099    | Promoter | -0.06 | 0.57  | -0.63 | 0.01                  |
| ETS1      | cg16792062    | Promoter | -0.06 | 0.54  | -0.60 | 0.01                  |
| ZNF709    | cg24109012    | Promoter | 0.04  | -0.41 | 0.45  | 0.01                  |
| BCAP29    | cg11785538    | Promoter | -0.06 | 0.42  | -0.48 | 0.03                  |
| GZMK      | cg14597388    | Promoter | -0.06 | 0.45  | -0.51 | 0.03                  |

FDR: False discovery rate. Wilcoxon non-parametric test was used to calculate the p value.

Supplementary Figure 1. Box plot showing a decrease in methylation level of loci other than identified CpGs in T24 and MCF7 cell line after decitabine treatment.

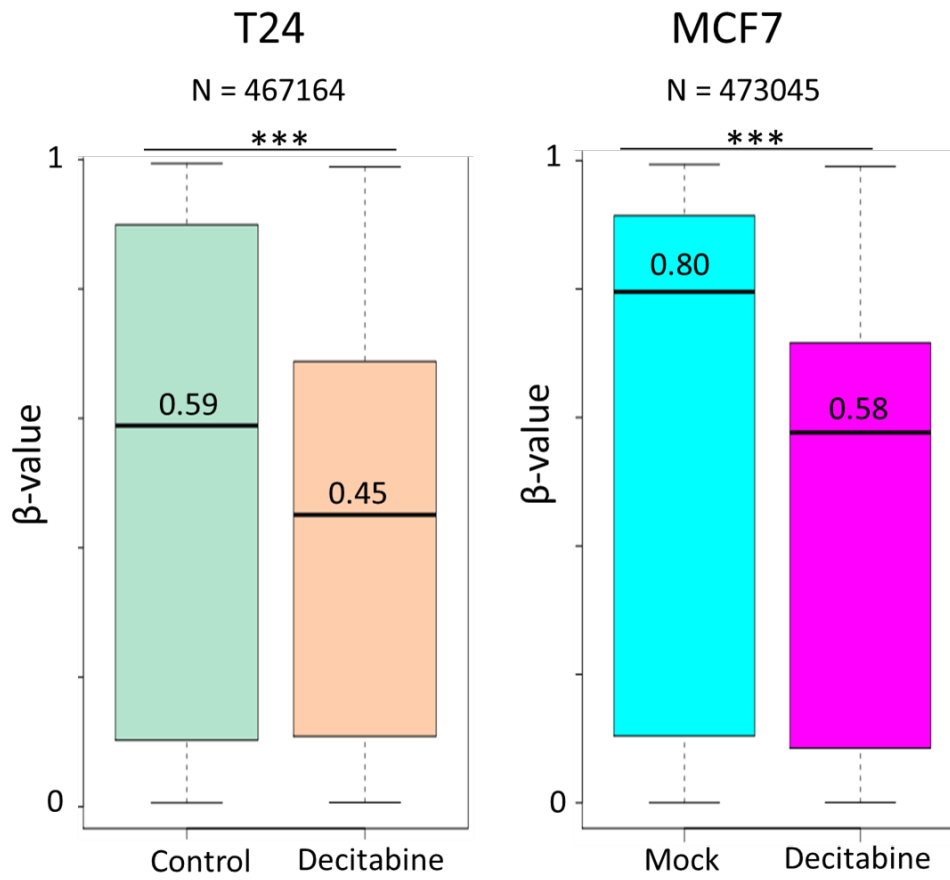

N denotes the total number of CpGs analyzed in the data. The data from the study by Han et al (GSE41525) and Leadem et al (GSE97483) are shown for T24 and MCF7 cells, respectively.

Supplementary Figure 2. Comparison of methylation levels of identified CpGs in decitabine treated and untreated 14 PBMCs (P1-P14), 8 tumor biopsies (T1-T8) and 6 ascites (A1-A6) samples of platinum resistant epithelial ovarian cancer patients.

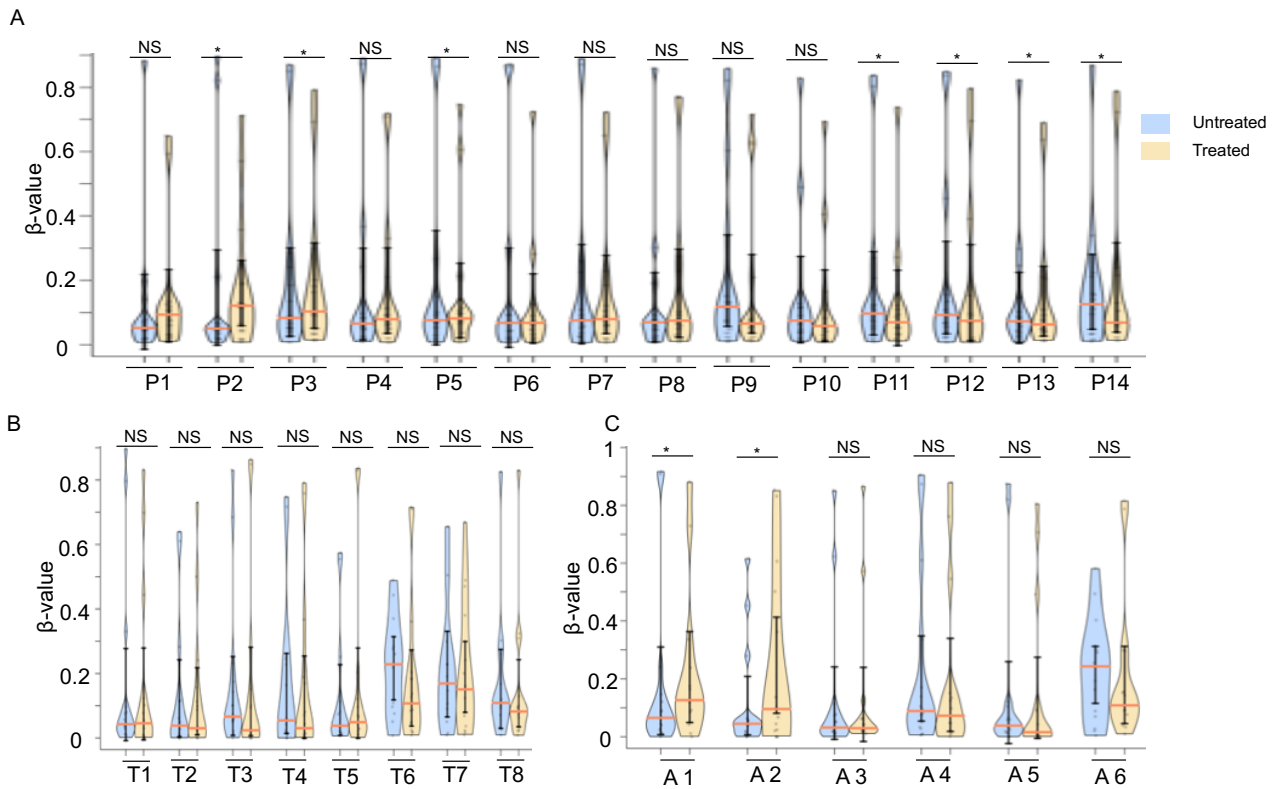

P denotes peripheral blood mononuclear cells, T tumor biopsy samples, and A ascites.

Pirate plot comparing the methylation profile of untreated (day 1) and decitabine treated (day 8) samples. PBMCs (A), tumor biopsy (B), and ascites (C) samples from recurrent platinum resistance ovarian cancer patients. Patients have been treated with decitabine (Eisai) at 10 mg/m<sup>2</sup> given intravenously daily for 5 days. The comparison has been made on the basis of 16 common CpGs out of 638 hypermethylated CpGs present in the data. The pirate plot shows the median methylation level (horizontal color line) and distribution pattern (mean ± standard error as vertical black line) of the 16 CpGs. The statistical significance was assessed using the non-parametric Wilcoxon signed-rank test. \*p < 0.05, NS= Not significant

Supplementary Figure 3. Enrichment analysis of identified CpGs in enhancer and regulatory regions.

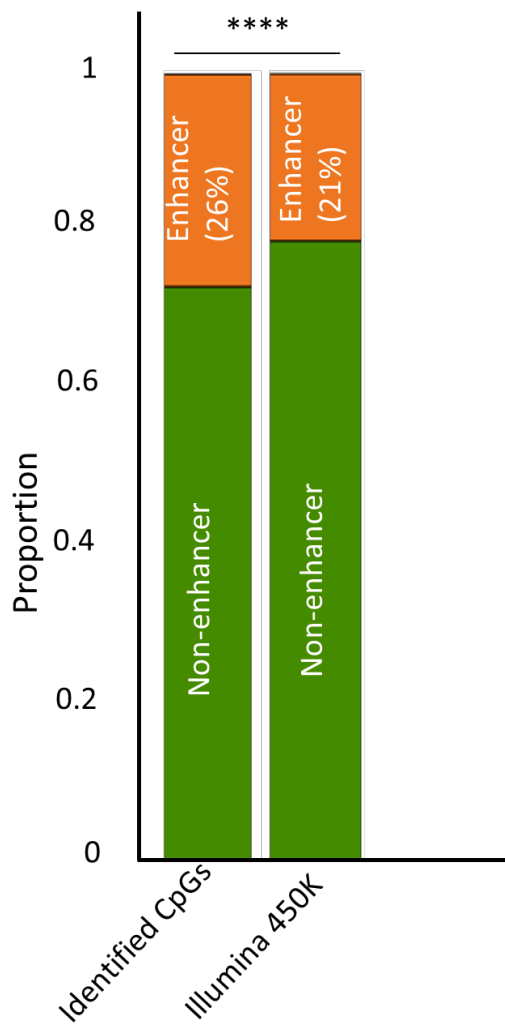

Enrichment of identified CpGs in enhancer region of the genome. CpGs with increased methylations were enriched in enhancer region (21% of identified CpGs were in enhancer region as compared to 26% of total CpGs present in 450K chip,  $P = 3.36 \times 10^{-4}$ ). The proportion of identified CpGs in enhancer region is shown as segmented barplot (upper segment). \*\*\* $P < 0.0005$ .

Supplementary Figure 4. Interaction network of genes regulated by NFATc1.

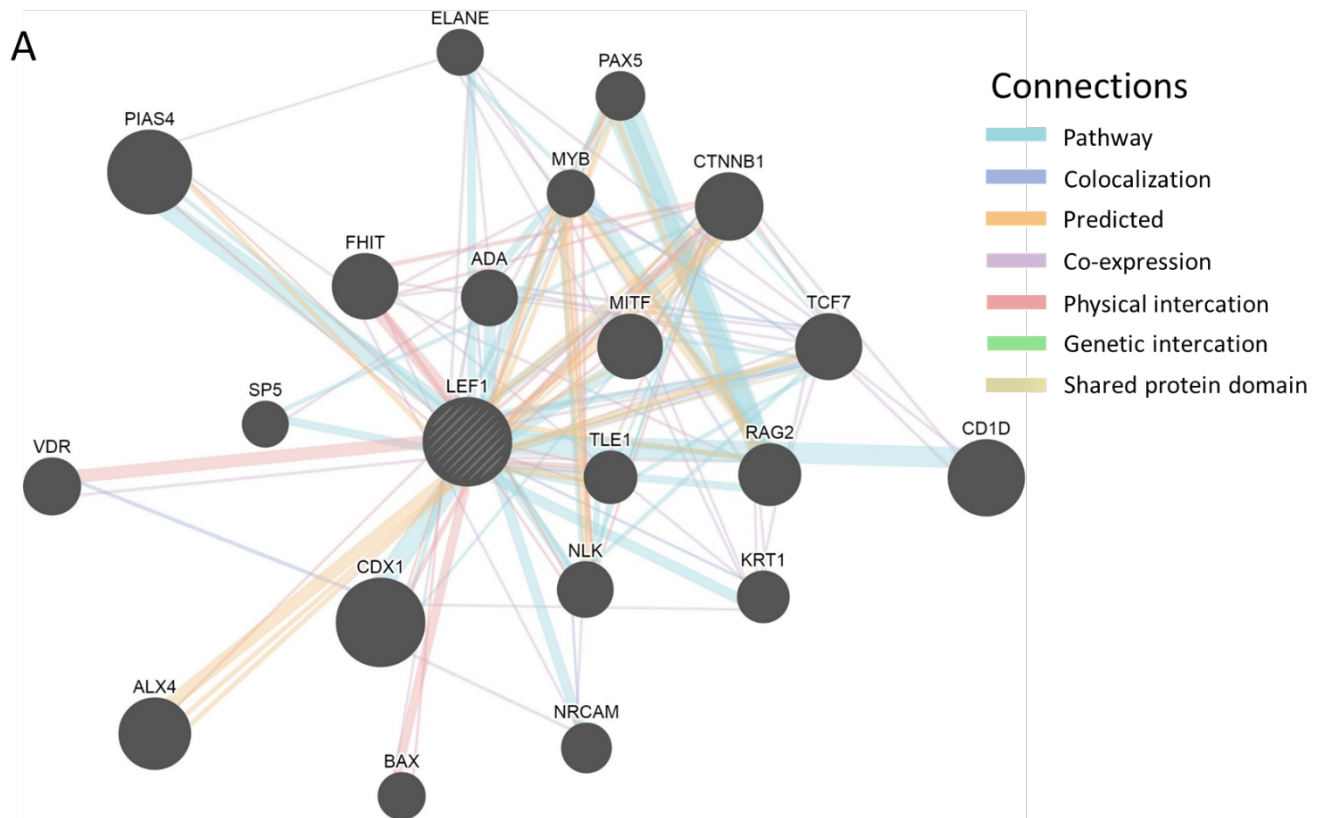

B

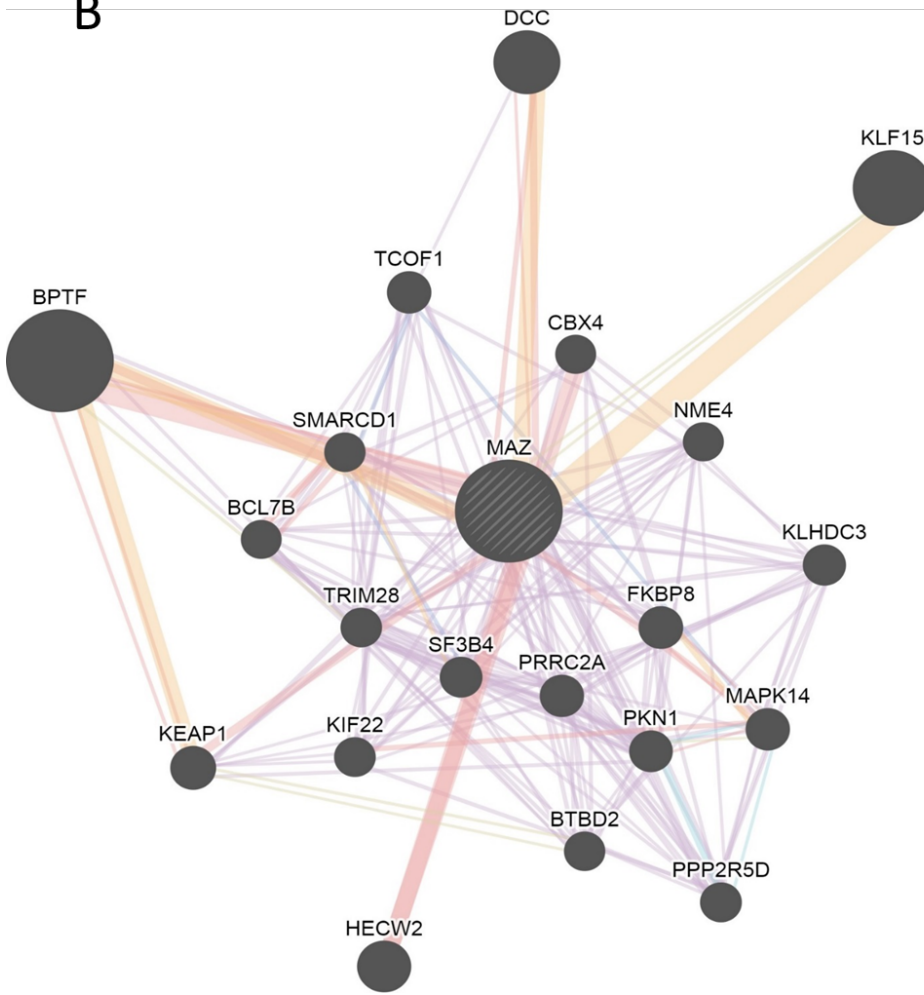

### Connections

- Pathway
- Colocalization
- Predicted
- Co-expression
- Physical interaction
- Genetic interaction
- Shared protein domain

C

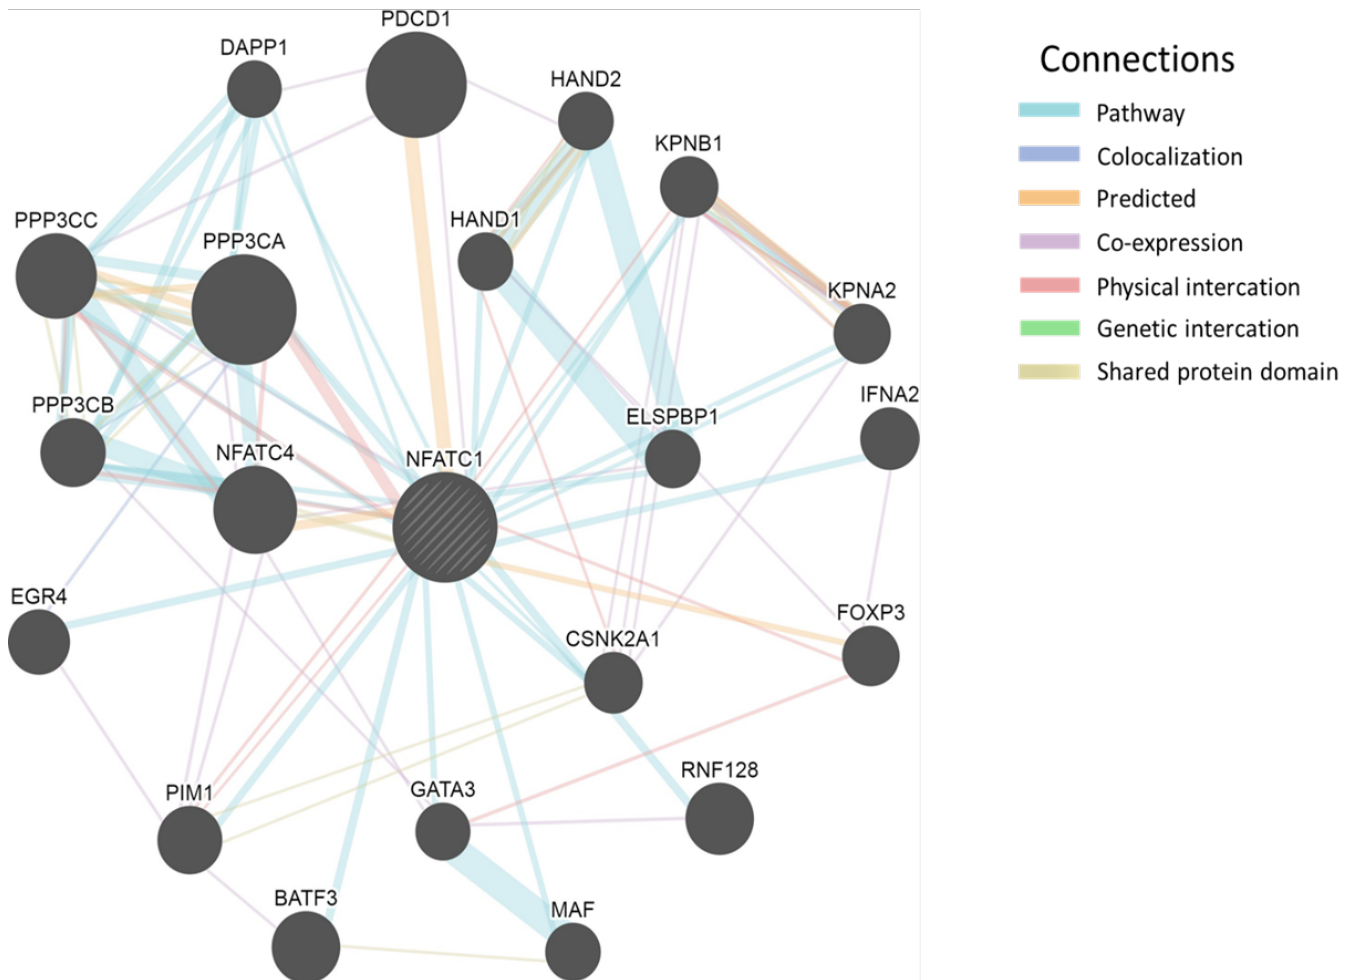

Only interactions among those genes that are directly connected to LEF1 (A), MAZ (B), and NFATc1 (C) have been shown using network construction from GENEMANIA. The size of the nodes is proportional to gene score calculated by GENEMANIA using label propagation algorithm that indicates the relevance of each gene to the original list based on the selected networks.



Supplementary Figure 5. Comparison of the expression levels of DNA methylating enzymes (DNMT3A, DNMT3B, DNMT1 and DNMTL) in 26 breast, 12 colorectal cancer and 13 ovarian cancer cell (Li H. et al., 2014) lines after 72 hours of low dose (0.5  $\mu$ M) azacytidine treatment.

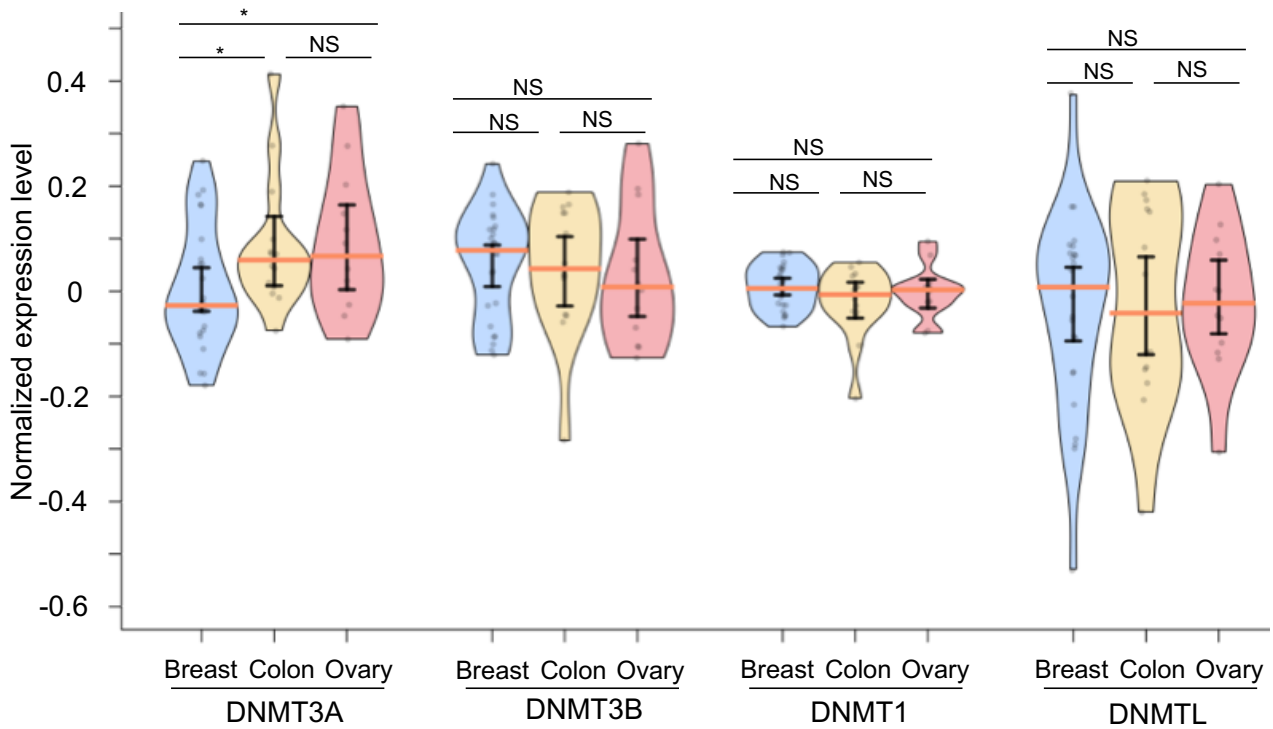

Pirate plots show the median methylation levels (horizontal colored line) and distribution pattern (mean  $\pm$  standard error as vertical black line) of the DNA methylating enzymes (DNMT3A, DNMT3B, DNMT1 and DNMT3L). NS= Not significant \* $p < 0.05$ . P value has been calculated using nonparametric Wilcoxon test.
